1           ***AfRip3*, a RIP3-like kinase, is identified as a key modulator of**  
2                                   **necroptotic death in *Aspergillus fumigatus***

3

4   **Jianbo Dai<sup>#1,2</sup>, Linlu Gao<sup>#1,2</sup>, Prakriti Sharma Ghimire<sup>1,2</sup>, Hui Zhou<sup>1</sup>, Yang Lü<sup>1</sup>,**  
5   **Jinghua Yang<sup>1</sup>, Haomiao Ouyang<sup>\*1</sup>, Cheng Jin<sup>\*1</sup>**

6   <sup>1</sup> State Key Laboratory of Mycology, Institute of Microbiology, Chinese Academy of  
7   Sciences, Beijing 100101, China; <sup>2</sup> University of Chinese Academy of Sciences,  
8   Beijing, China.

9

10   \* To whom corresponding should be addressed:

11   1-3 West Beichen Road, Chaoyang District, Beijing 100101, China

12   Tel: +86-10-64807425

13   Fax: +86-10-64807429

14   e-mail: [jinc@im.ac.cn](mailto:jinc@im.ac.cn) or [ouyanghm@im.ac.cn](mailto:ouyanghm@im.ac.cn)

15

16   # These authors made contribution equally to this work.

17

18 **Abstract**

19 *Aspergillus fumigatus* exhibits autophagic and necroptotic process when its GPI  
20 anchor synthesis is suppressed. A putative kinase (AFUA\_6G02590) is found to be  
21 overexpressed in response to GPI anchor suppression and identified as a RIP3-like  
22 protein, namely *AfRip3*. To elucidate its function, in this study a *Afrip3*-  
23 overexpressing strain OE-*Afrip3* was constructed. Although OE-*Afrip3* strain  
24 exhibited an increased cell death, neither apoptotic nor autophagic process was  
25 activated. Our evidences demonstrated that overexpression of *Afrip3* gene in *A.*  
26 *fumigatus* only led to necroptosis, while the *Afrip3*-knockout mutant was unable to  
27 activate necroptotic process. Further analysis revealed that both JNK and SMase  
28 pathways were activated in OE-*Afrip3* strain, by which an increase of reactive oxygen  
29 species (ROS) was induced. We also showed that expression of *Afrip3* gene was  
30 induced by  $Ca^{2+}$ . In addition, eEF1 $\beta$  and adenylylsulfate kinase (ASK) were  
31 identified as potential candidates to interact with *AfRip3*. These results indicate that  
32 *AfRip3* is a key modulator that activates necroptotic process in *A. fumigatus*, which  
33 can be induced by  $Ca^{2+}$  and in turn activate JNK (c-Jun NH<sub>2</sub>-terminal kinase) and  
34 SMase (sphingomyelinase) pathway. Our findings suggest that necroptotic pathway in  
35 *A. fumigatus* is distinct from that in mammalian cell and may provide a new strategy  
36 for development of anti-fungal drug.

37

38 **Author summary**

39 *Aspergillus fumigatus* is a human fungal pathogen and causes invasive aspergillosis  
40 (IA) in immunocompromised patients with high mortality (30-95%). Development of  
41 novel therapies is urgently needed. In this study, we confirm *AfRip3*  
42 (AFUA\_6G02590), a RIP3-like protein, is a key modulator that activates necroptotic  
43 process in *A. fumigatus*. We also find that cytosolic  $Ca^{2+}$  can induce the expression of  
44 *Afrip3* and activated *AfRip3* in turn activate JNK (c-Jun NH<sub>2</sub>-terminal kinase) and  
45 SMase (sphingomyelinase) pathway. Our findings suggest that necroptotic pathway in  
46 *A. fumigatus* is distinct from that in mammalian cell and may provide a new strategy  
47 for development of anti-fungal drug.

## 48 **Introduction**

49 Programmed cell death (PCD) plays a significant role in the development, immune  
50 homeostasis, and host defense of multicellular organisms. To date, three types of PCD  
51 have been described in higher eukaryotes, including apoptosis, autophagy, and  
52 necroptosis (also known as programmed necrosis). Apoptosis is the most conserved  
53 form of PCD, requires the activation of caspases, and is defined by chromatin  
54 condensation, DNA fragmentation, cell shrinkage, blebbing of plasma membrane and  
55 formation of apoptotic bodies. Autophagy is a lysosome degradation pathway by  
56 which cells capture intracellular proteins, lipids and organelles, and deliver them to  
57 the lysosome compartment. It is induced under conditions of nutrient starvation,  
58 liberating energy stores and promoting cellular survival [1]. Necroptosis, which is  
59 previously known as necrosis and once thought to be genetically uncontrolled, is also  
60 programmed cell death [2-5] and morphologically characterized by rupture of plasma  
61 membrane and organelle breakdown [6-7].

62 Necroptosis can be initiated by death ligands, Toll-like receptor ligands (TLRs), or  
63 microbial infection [8]. The most well-studied signaling pathway induced by death  
64 ligands is tumor necrosis factor (TNF). Signaling from TNF receptors activates the  
65 receptor-interacting protein kinase 1 (RIP1) and RIP3. RIP1 is a death-domain-  
66 containing kinase containing a conserved kinase domain in the N-terminus and a RIP  
67 homotypic interaction motif (RHIM) domain in the C-terminus, but its kinase activity  
68 is dispensable for inducing death-receptor-mediated apoptosis [9-10]. RIP3 shares  
69 30%-40% sequence similarity with RIP1 and is essential for necroptosis. RIP1, RIP3  
70 and mixed lineage kinase domain-like protein (MLKL) form a necrosis signaling  
71 complex named necrosome, within which MLKL is phosphorylated by RIP3. The  
72 phosphorylated MLKL forms an oligomer and binds to the plasma and intracellular  
73 membranes to form membrane-disrupting pores, which results in necroptotic death  
74 [10-14]. On the other hand, RIP3-dependent necrosis can also proceed without RIP1.  
75 Indeed, RIP3-dependent necroptosis upon ectopic expression of RIP3 has been  
76 described in RIP1-deficient MEF cells [15]. Under certain cellular conditions  
77 necroptosis can occur in the absence of RIP1 in L929 cells [16]. However, the precise

78 mechanism of RIP1-independent necroptosis remains unclear.

79 *Aspergillus fumigatus* is a human fungal pathogen capable of causing infections  
80 ranging from allergic to invasive disease [17], and the major cause of invasive  
81 aspergillosis (IA) in immunocompromised patients [18]. In these patients, the crude  
82 mortality is 30-95%. Despite some effective drug treatments, mortality from fungal  
83 infections remains about 50%, and new drugs are urgently needed due to the  
84 inefficacy, side effects and resistance that have emerged as important factors limiting  
85 successful clinical outcome [19-23]. A major barrier for the development of novel  
86 therapies is the general lack of capacity in fungal pathogen research [24].

87 Although PCD has already been discovered from bacteria to animals [25-28], in  
88 contrast to that in mammalian cells, little is known about death process in filamentous  
89 fungi. In filamentous fungi autolysis is a highly regulated and natural process that  
90 occurs later in older, stationary phase cultures and leads to the progressive  
91 disintegration of the mycelium. In *A. fumigatus*, it has been revealed that autolysis  
92 during the stationary phase is an apoptotic process and caspase-dependent [29].  
93 However, autophagic and necroptotic process in *A. fumigatus* remain unclear.

94 Previously, we have shown that suppression of GPI anchor synthesis leads to both  
95 autophagic and necroptotic process in *A. fumigatus*. Suppression of the GPI anchor  
96 synthesis leads to activation of phosphatidylinositol (PtdIns) signaling and ER stress,  
97 which in turn induce increased cytosolic  $Ca^{2+}$ , activate PtdIns3K and induce  
98 autophagy [30]. Meanwhile an necroptotic process is also induced. Although the  
99 mechanism of necroptosis remains unclear, a putative kinase (AFUA\_6G02590) has  
100 been identified as a RIP3-like protein, namely *AfRip3*, which only contains a kinase  
101 domain and lacks the homotypic interaction motif (RHIM) required for interaction  
102 with RIP1 [30].

103 To elucidate the potential role of *AfRip3* in cell death process of *A. fumigatus*, a  
104 *Afrip3*-overexpressing strain OE-*Afrip3* and a *Afrip3*-knockout mutant were obtained  
105 in this study. Analysis of the OE-*Afrip3* strain revealed that overexpression of the  
106 *Afrip3* only induced necroptosis but not apoptosis or autophagy. Meanwhile the  
107 *Afrip3*-knockout strain was unable to activate necroptotic process. Further analysis

108 revealed that *AfRip3* was activated by calcium and executed necroptosis by activating  
109 JNK and SMase pathway. In addition, eEF1B $\gamma$  and adenylylsulfate kinase (ASK)  
110 were identified as potential candidates to interact with *AfRip3*.

111

## 112 **Results**

### 113 ***Afrip3*-overexpression induces cell death of *A. fumigatus***

114 Expression vector was constructed by introducing a copy of *Afrip3* gene into pVG2.2,  
115 a vector comprising of two modules: one module ensures constitutive expression of  
116 the tetracycline dependent transactivator rtTA2S-M2 and another one harbors the  
117 rtTA2S-M2-dependent promoter that controls expression of the gene of interest  
118 [31-32]. The *Afrip3* expression vector was then transformed into *A. fumigatus* and  
119 screened for uridine and uracil autotrophy [33]. As a result, twenty-four transformants  
120 were obtained, while sixteen were confirmed to be correct by PCR analysis. As shown  
121 in Fig 1A, a 863-bp fragment of *pyrG* and a 1102-bp fragment of pVG2.2 vector were  
122 amplified from the genomic DNA of OE-*Afrip3* strain and sequenced, while no such  
123 fragments were amplified from the wild-type (WT). Quantitative RT-PCR analysis  
124 revealed that the expression of *Afrip3* in OE-*Afrip3* strain was 3.8 times of that in the  
125 WT, indicating that OE-*Afrip3* strain was successfully constructed (Fig 1B).

126 After 24 h of incubation, both WT and OE-*Afrip3* strain reached their log-phase and  
127 mycelia were stained with propidium iodide (PI), a dye that labels the nucleus in  
128 dying cells and is widely used to detect cell membrane integrity and cell viability  
129 [34-36]. As shown in Fig 2, under microscope about 75.5% of mycelia of the the  
130 OE-*Afrip3* were PI-positive, while PI staining was not observed in the WT, indicating  
131 an occurrence of cell death in OE-*Afrip3* strain at its log-phase. This result indicates  
132 that elevated expression of the *Afrip3* induces cell death of *A. fumigatus*.

133

### 134 **Analysis of PCD pathway in strain OE-*Afrip3***

135 To clarify the pathway of cell death in OE-*Afrip3* strain, three types of PCDs were  
136 analyzed in this study. In mammalian cells apoptosis is featured with activation of  
137 Caspase-8 and translocation of phosphatidylserine (PtdSer) [37-38]. As apoptosis in

138 *A. fumigatus* shares features of the apoptotic pathway of mammalian cells [29], we  
139 first checked CasA, a counterpart of caspase-8, and exposure of PtdSer in OE-*Afrip3*  
140 strain. When the WT was cultured in presence of apoptosis-inducer dexamethasone,  
141 an elevated activity of CasA was induced (Fig 3A) and exposure of PtdSer was  
142 detected (Fig 3B), indicating an occurrence of dexamethasone-induced apoptosis in *A.*  
143 *fumigatus*. However, as compared with that in WT, the CasA activity in OE-*Afrip3*  
144 strain was declined by 39.3% (Fig 3A) and exposure of PtdSer was not detected (Fig  
145 3B). These results demonstrate that overexpression of the *Afrip3* does not activate  
146 apoptotic pathway in *A. fumigatus*.

147 Atg8/LC3 (microtubule-associated protein 1 light chain 3) is a reliable markers for  
148 autophagy [39]. Previously, we have shown that suppression of GPI anchor synthesis  
149 induces activation of Atg8/LC3 homolog and autophagy [30]. To determine if the  
150 autophagic pathway was activated in OE-*Afrip3* strain, Atg8/LC3 homolog was  
151 detected by either anti-LC3I and anti-LC3II antibodies. As shown in Fig 4, both LC3I  
152 and LC3II detected in OE-*Afrip3* strain were similar with that in the WT. This result  
153 demonstrates that overexpression of the *Afrip3* gene does not elicit autophagic  
154 process.

155 As necroptosis is morphologically characterized by organelle damage, cell swelling  
156 and rupture of the plasma membrane [8], we further checked the morphology of  
157 OE-*Afrip3* strain under transmission electron microscope (TEM). As shown in Fig 5,  
158 massive vacuolization and translucent cytoplasm were observed in 85.2% cells of the  
159 OE-*Afrip3* grown in CM for 24 h, while no such phenotype was found in the WT.  
160 This observation suggests a release of the cytoplasmic contents in the OE-*Afrip3* cells.  
161 To evaluate the rupture of the plasma membrane of OE-*Afrip3* strain, the leakage of a  
162 cytoplasmic lactate dehydrogenase (LDH) was detected by using the method  
163 established by Xie et al. [40]. As shown in Fig 6A, LDH activity in the WT was  
164 determined as 63 U/mg, while LDH activity in OE-*Afrip3* strain was 152U/mg, which  
165 is 2.4-fold of that in the WT. We further examined plasma membrane integrity in  
166 OE-*Afrip3* strain by using GPI-anchored membrane protein Ecm33 as a reporter.  
167 Western blotting analysis revealed that Ecm33 was increased in the culture

168 supernatant of OE-*Afrip3* strain (Fig 6B). These results confirm an occurrence of  
169 membrane rupture and a significant leakage of intracellular enzyme and membrane  
170 proteins in OE-*Afrip3* strain, indicating an activation of necroptotic process in  
171 OE-*Afrip3* strain.

172 To further confirm the regulatory role of *AfRip3* in necroptosis, *Afrip3* gene was  
173 deleted in *A. fumigatus*. When the WT was cultured in liquid CM supplemented with  
174 TSZ, a cocktail of necroptosis-inducers consisting of TNF- $\alpha$ , SM-164 and  
175 Z-VAD-FMK, necroptotic cell death was induced. However, in the  $\Delta$ *Afrip3* mutant  
176 no cell death was induced by TSZ (Fig 7). Taken together, our results confirm that  
177 *AfRip3* is a regulator of necroptotic cell death in *A. fumigatus*.

178

### 179 **Regulation of *Afrip3* gene expression**

180 As release of the ER- $\text{Ca}^{2+}$  is the main effect causes both autophagy and necroptosis in  
181 *A. fumigatus* [30], we assumed that  $\text{Ca}^{2+}$  is also an factor to induce expression of the  
182 *Afrip3*. To verify this hypothesis, we tested the effect of calcium ion on expression of  
183 the *Afrip3*. As shown in Fig 8A, when the WT was cultured with  $\text{CaCl}_2$  for 24 h, the  
184 expression of *Afrip3* gene was up-regulated up to 2.5-, 1.25- and 1.5-fold in presence  
185 of 0.1 mM, 1 mM and 10 mM  $\text{CaCl}_2$ , respectively. We also tested the effect of inositol  
186 and fermentation broth on expression of the *Afrip3*. Inositol was able to slightly  
187 up-regulate the expression of the *Afrip3*, while fermentation broth slightly inhibited  
188 the expression of the *Afrip3*. These results demonstrate that the expression of *Afrip3*  
189 gene is activated by  $\text{Ca}^{2+}$ , but not by inositol or metabolites produced by aging *A.*  
190 *fumigatus*.

191 During autophagic process, the Vps34-Atg6/beclin1 class III phosphoinositide  
192 3-kinase (PtdIns3K) complex is another important subgroup of the “core” Atg  
193 proteins [41]. RT-qPCR analysis showed that  $\text{Ca}^{2+}$  was able to induce an increased  
194 expression of PtdIns3K/Vps34 up to 2.2-fold in the wild-type *A. fumigatus* (Fig 8B).  
195 These results are consistent with our previous findings that autophagy in the *afpig-a*  
196 conditional mutant is induced by  $\text{Ca}^{2+}$  [30] and indicate that  $\text{Ca}^{2+}$  is also able to  
197 activate necroptotic process through induction of *Afrip3*-expression in *A. fumigatus*.

198

### 199 **Activation of JNK and SMase pathway by *AfRip3***

200 Upon suppression of the GPI anchor synthesis some of the molecules involved in  
201 necroptosis are induced at least 1.5-fold, such as glycogen phosphorylase (PYGL),  
202 glutamate-ammonia ligase (GLUL), glutamate dehydrogenase 1 (GLUD1), Nfr1/AIF,  
203 cyclophilins, JNK1, Hsp70 family proteins, PKA, glyoxalase family proteins and  
204 Rab7. While several other proteins required for necroptosis were suppressed, such as  
205 sphingomyelin phosphodiesterase (SMase), ceramidase, poly(ADP)-ribose  
206 polymerase (PARP) and calpains [15, 30]. In this study, we also tested the expression  
207 of these genes in OE-*Afrip3* strain. As summarized in Table 1, Nfr1/AIF,  
208 cyclophilins, JNK1, Hsp70 family proteins, glyoxalase family proteins and Rab7 were  
209 induced (Table 1), which is consistent with that in the *afpig-a* conditional mutant [30].  
210 On the other hand, although Ca<sup>2+</sup> was able to induce an elevated expression of the  
211 genes encoding PYGL, GLUL, GLUD1, JNK1 and SMase in the wild-type *A.*  
212 *fumigatus* (Fig 8C), PYGL, GLUL, GLUD1, PKA, and Rab7 were suppressed in  
213 OE-*Afrip3* strain (Table 1).

214 In mammalian cells, the c-Jun NH<sub>2</sub>-terminal kinase (JNK) is activated by TNF and  
215 initiates necroptotic cell death by inducing ROS production [42-44] and  
216 sphingomyelinase (SMase) pathway, which lead to lysosomal membrane  
217 permeabilization [45-47]. SMase and ceramidase are key enzymes in  
218 sphingomyelinase (SMase) pathway. It is interesting to note that, unlike that in the  
219 *afpig-a* conditional mutant, SMase and ceramidase in OE-*Afrip3* strain were induced  
220 5.9- and 3.7-fold, respectively (Table 1). As both JNK1 and SMase elicit ROS  
221 generation [48], we further detected ROS in the OE-*Afrip3* strain with  
222 dihydroethidium, a dye that can permeate viable cells and accumulate in the nucleus  
223 when dehydrogenated to ethidium bromide. As shown in Fig 9, OE-*Afrip3* strain was  
224 positive-stained by dihydroethidium, whereas the WT was negative, indicating a  
225 significant increase of ROS in OE-*Afrip3* strain. All these data establish that  
226 overexpression of *Afrip3* gene triggers necroptotic process by activating JNK1 and  
227 SMase, thereby allowing the generation of ROS, and further promoting lysosome



228 membrane permeabilization.

229

### 230 **Identification of proteins that potentially interact with *Af*RIP3**

231 In attempt to identify the downstream target of *Af*Rip3, pull-down assay was carried  
232 out by using GST-*Af*Rip3 protein expressed in *A. fumigatus* (Fig 10A). A 25 kDa  
233 protein band was detected on SDS-PAGE (Fig 10B) and analyzed by mass spectrum.  
234 As a result, 23 proteins were identified (S1 Table). Among these proteins, eEF1By  
235 and adenylylsulfate kinase (ASK) were confirmed to interact with *Af*Rip3 by co-IP  
236 with anti-His-tag mAb-Magnetic Beads (Fig 10C).

237

### 238 **Discussion**

239 In mammalian cells, RIP1 and RIP3 are important modulators of apoptosis and  
240 necroptosis. When caspase activity is inhibited, RIP1 and RIP3 interact via RHIM to  
241 form necrosome, which recruits and activates downstream substrates to trigger  
242 necroptosis [8-14]. On the other hand, RIP1-independent cases have been reported  
243 recently [15-16]. Over-expression of RIP3 can cause necroptosis of the RIP1<sup>-/-</sup> and  
244 caspase 8<sup>-/-</sup> murine embryonic fibroblasts (MEFs) [16]. Knock-down of RIP1 did not  
245 block cell death when L929 cells were exposed to TNF [49]. When fibroblasts are  
246 stimulated by Toll-like receptor 3 (TLR3), elimination of caspase 8 results in  
247 RIP3-dependent and RIP1-independent necroptosis [50]. Therefore, it seems that  
248 RIP1 is not required for necroptosis under certain conditions.

249 Previously, in an attempt to identify the necroptotic modulator in *A. fumigatus*,  
250 commercially available RIP1 and RIP3 antibodies were used to detect the *A.*  
251 *fumigatus* RIP1 and RIP3 homologs. As a result, a putative protein kinase  
252 (AFUA\_6G02590), namely *Af*Rip3, was identified by the RIP3 antibody and  
253 overexpressed in response to suppression of the GPI anchor synthesis, however, this  
254 putative protein kinase only contains a kinase domain, while the homotypic  
255 interaction motif (RHIM) that is required for interaction with the RIP1 is absent. It  
256 should be pointed out that homologs of *Af*Rip3 were found to be widely distributed in  
257 filamentous fungi while no such protein was found in *Saccharomyces cerevisiae*,

258 suggesting its important role in multicellular eukaryotic microbes. On the other hand,  
259 no homolog has been detected by the RIP1 antibody [30].

260 To investigate the role of *AfRip3* in *A. fumigatus*, in this study we overexpressed  
261 *Afrip3* gene in *A. fumigatus*. As expected the *Afrip3*-overexpressing strain OE-*Afrip3*  
262 exhibited an increased cell death even at its log-phase, which confirms that *Afrip3*  
263 gene is involved in the cell death of *A. fumigatus*. Analysis of OE-*Afrip3* strain  
264 revealed that this increased cell death was triggered via necroptotic pathway, instead  
265 of apoptotic or autophagic pathway. Meanwhile a mixture of necroptosis inducers  
266 (TNF- $\alpha$ , SM-164 and Z-VAD-FMK) was unable to induce necroptotic process once  
267 the *Afrip3* was deleted in *A. fumigatus*. These evidences confirm that *AfRip3* plays a  
268 central role in necroptotic pathway.

269  $Ca^{2+}$  is reported to induce autophagic and necroptotic death in fungi and mammals  
270 [51]. A connection between  $Ca^{2+}$  and necroptosis has been suggested by the  
271 observation of the increased intracellular  $Ca^{2+}$  concentration upon TNF stimuli [52].  
272 In the meantime, the autophagy pathway initiated by a  $Ca^{2+}$ -mediated mechanism in  
273 some types of cell was also unraveled [53-54]. Also, it is reported that in yeast cell  
274 viability was reduced to 80% when incubated with 1 mM or 50 mM  $Ca^{2+}$ . However,  
275 when yeast was incubated with a low concentration of  $Ca^{2+}$  such as 0.1  $\mu$ M  $Ca^{2+}$ , the  
276 cell viability was reduced to 67% [55]. These observations imply that effect of  $Ca^{2+}$   
277 on the yeast cell viability is dose-dependent. Our results indicate that  $Ca^{2+}$  has a  
278 spectacular impact on both autophagic and necroptotic cell death in *A. fumigatus*. We  
279 found that the presence of 0.1 mM of  $Ca^{2+}$  in culture medium was able to induce  
280 expression of the genes not only in necroptotic pathway but also in autophagic  
281 pathway. In case of necroptosis, it reasonable to conclude that the increased cytosolic  
282  $Ca^{2+}$  is one of factors to activate *AfRip3* and then initiates necroptotic cell death in *A.*  
283 *fumigatus*.

284 In mammalian cells, MLKL has been identified as downstream substrate of RIP3 [56].  
285 However, homolog of MLKL is not found in *A. fumigatus*. To identify the potential  
286 downstream substrate of *AfRip3*, pull-down assay and co-immunoprecipitation were  
287 carried out in this study. Based on our results, it is likely that eEF1B $\gamma$  and ASK

288 interact with *AfRip3*. Searching of the DRYGIN (Data Repository of Yeast Genetic  
289 INteractions), a database of quantitative genetic interaction network in yeast, with  
290 ASK reveals that MET14 is homolog of ASK in *S. cerevisiae*, which is correlated  
291 with CSR1, a phosphatidylinositol transfer protein and has a potential role in  
292 regulating lipid metabolism under certain conditions. Also MET14 exerts negative  
293 genetic interaction on FPR4, a peptidyl-prolyl cis-trans isomerase (PPIase) involved  
294 in signal transduction, cell differentiation and apoptosis [57-58]. Presumably, *A.*  
295 *fumigatus* ASK plays a role as MET14 does in yeast, which might be the way that  
296 *AfRip3* passes the necroptotic signal to its downstream. Somehow, further  
297 investigation needs to be carried out.

298 In summary, in this study we confirmed that *AfRip3* was a necroptotic regulator in *A.*  
299 *fumigatus*. Expression of the *AfRip3* was induced by Ca<sup>2+</sup> and interacted with JNK  
300 and SMase pathway, which then caused the ROS generation and the rupture of  
301 membrane. ASK was identified as potential downstream substrate of *AfRip3*. Our  
302 findings reveal that modulation of necroptotic death of *A. fumigatus* is distinct from  
303 that in mammalian cells and may provide a new strategy for development of  
304 anti-fungal drug.

305

## 306 **Material and Methods**

### 307 **Strains and growth conditions**

308 *Aspergillus fumigatus* strain YJ-407 (China General Microbiological Culture  
309 Collection Center, CGMCC0386) was maintained on potato glucose (2%) agar slant.  
310 *A. fumigatus* strain CEA17 and plasmid pCDA14 are from C. d'Enfert, Institut  
311 Pasteur, France. Strain was propagated at 37°C on complete medium (CM), or  
312 minimal medium (MM) with 0.5 mM sodium glutamate as a nitrogen source. Uridine  
313 and uracil were added at a concentration of 5 mM when required. Mycelia were  
314 harvested from strains grown in CM at 37°C with shaking at 200 rpm. At the specified  
315 culture time point, mycelia were harvested and washed with distilled water, then  
316 frozen in liquid nitrogen and ground. The powder was stored at -80°C for DNA, RNA  
317 and protein extraction. Conidia were prepared by growing *A. fumigatus* strains on

318 solid CM with uridine and uracil (CMU) at 37°C for 36 h. The spores were collected,  
319 washed twice with 0.01% Tween 20 in PBS and resuspended in PBS, and its  
320 concentration was confirmed by haemocytometer counting and viable counting.  
321 Vectors and plasmids were propagated in *Escherichia coli* DH5 $\alpha$  (Bethesda Research  
322 Laboratories).

323

### 324 **Construction of *Afrp3*-overexpressing strain OE-*Afrp3***

325 The open reading frame of the *Afrp3* was amplified using primer pairs *Afrp3*-up  
326 (5'-AGCTTTGTTTAAACATGAATAATGTTTCGGCGAAGGCG-3') and *Afrp3*-  
327 down (5'-AGCTTTGTTTAAACGCACTGCCTCCGTCGTCTCA-3') from *A.*  
328 *fumigatus* cDNA. The PCR products were digested with *PmeI* and ligated into  
329 plasmid pVG2.2 (a gift from Leiden University), which contains the *pyrG* as a  
330 selective maker. The plasmid obtained (pVG2.2-*Afrp3*) was transformed into *A.*  
331 *fumigatus* CEA17. The OE-*Afrp3* strain was confirmed by PCR amplification. Using  
332 Pr-up-1 (5'-ATAGGGCATATTCAACTACCTGGC T-3') and Pr-down (5'-GTTTA  
333 TAGACTCTCAATTCGCGATC-3') as primers, real-time PCR analysis was carried  
334 out to detect a 100-bp fragment of the *Afrp3* gene with 18s rRNA as control.

335

### 336 **Construction of the $\Delta$ *Afrp3* mutant**

337 Flanking regions of *Afrp3* gene were amplified from *A. fumigatus* strain YJ-407  
338 genomic DNA. The upstream and downstream flanking regions of *Afrp3* gene were  
339 amplified with Up-rip3-5' (5'-GCGGCCGCGCGCAGAATATGGCCGTGG-3') and  
340 Up-rip3-3' (5'-GGATCCCCCGGGGACGCCATTGAATCCAGCTC-3'), Down-  
341 rip3-5' (5'-GGATCCCCTGCTTCGCGTTACACCC-3') and Down-rip3-3' (5'-ATG  
342 CATGCGGCCGCGCACAAGACCGC GACTCGAT-3'), respectively. The amplified  
343 fragments were digested with *Bam*HI/*Not*I. The *pyrG*-blaster cassette (8.6 kb) in  
344 pCDA14 was obtained by *Hpa*I digestion and cloned into the *Sma*I site between the  
345 up- and down-stream non-coding regions of the *Afrp3* to yield pRIP3-*pyrG*. The  
346 resulting plasmid was linearized at a unique *Not*I site and transformed into the CEA17  
347 strain by protoplast transformation [33].

348

### 349 **Caspase activity assay**

350 Proteins were extracted by grounding mycelia in liquid nitrogen, resuspending the  
351 powder in ice-cold lysis buffer (50 mM Hepes, pH 7.4, 1 mM DTT, 0.5 mM EDTA,  
352 and 0.1% (v/v) Chaps), and centrifugation at  $1,500\times g$  for 10 min [29]. The caspase  
353 activities of the supernatant against substrates for caspase 8 were determined using a  
354 fluorescent assay based on the cleavage of a AMC (7-amino-4-methylcoumarin) dye  
355 from the C-terminal of specific peptide substrates (Caspase Fluorescent (AMC)  
356 Substrate/Inhibitor QuantiPak™) (BioMol International).

357

### 358 **Necroptosis induction of the $\Delta Afrp3$ mutant**

359  $1\times 10^6$  spores were inoculated into 1 ml liquid CM with 1  $\mu$ l TSZ and incubated at  
360 37°C for 4 hours, then stained with 5  $\mu$ l Hoechst33342 and 5  $\mu$ l propidium iodide (PI)  
361 at 4°C for 20 minutes. The spores were collected and then examined under the  
362 fluorescence microscope using a Zeiss Imager A2 (Zeiss, Japan). TSZ, a mixture of  
363 TNF- $\alpha$ , SM-164 and Z-VAD-FMK in Necroptosis Inducer Kit (C1058S, Beyotime,  
364 China), was used to induce necroptosis. Hoechst and PI were from Apoptosis and  
365 Necrosis Assay Kit (C1056, Beyotime, China).

366

### 367 **Real time PCR**

368 Total RNA was isolated with TRIzol reagent (Invitrogen) and 1  $\mu$ g of RNA samples  
369 were reverse-transcribed in a final volume of 20  $\mu$ L using HiScript II Q RT SuperMix  
370 for qPCR (+gDNA wiper) (Vazyme) according to the manufacturer's instructions.  
371 Quantitative RT-PCR was carried out in a CFX960 (Bio-Rad, USA) using the primers  
372 (0.5  $\mu$ M), 1  $\mu$ L cDNA, 10  $\mu$ L ChamQ SYBR qPCR Master Mix (Vazyme) in a final  
373 volume of 20  $\mu$ L. Cycle conditions were 95°C for 5 min for the first cycle, followed  
374 by 45 cycles of 95°C for 10 s, 60°C for 15 s, and 72°C for 1 s. Quantification of  
375 mRNA levels of different genes was performed using the  $2^{-\Delta\Delta Ct}$  method. Primers used  
376 in this study are listed in supplemental S2 Table. Triplicates of samples were analyzed  
377 in each assay, and each experiment was repeated at least three times.

378

### 379 **Extraction of extracellular protein**

380 Freshly prepared 2% (w/v) sodium deoxycholate was added into the medium (1/100  
381 in volume), mixed and placed at 4°C for 30 min. Then, 100% trichloroacetic acid  
382 (1/10 in volume) was added and reacted at 4°C for 30 min. After centrifugation  
383 (15,000 × g for 15 min, 4°C), the extracellular proteins were precipitated, then washed  
384 three times with acetone, dried and dissolved.

385

### 386 **Expression and purification of recombinant *AfRip3* in *E. coli***

387 *A. fumigatus Afrip3* cDNA was cloned in the pET30a expression vector, in which a  
388 stretch of six histidine residues was added at the C-terminal of *AfRip3*. *E. coli* BL21  
389 (Rossetta) was transformed with the recombinant vector, and protein expression was  
390 induced at the log phase of bacterial growth (OD=0.4-0.6) by the addition of IPTG  
391 (Sigma-Aldrich) to 0.4 mM for 8 h. The cells were harvested by centrifugation and  
392 resuspended in 50 mL 1× binding buffer (0.02 M sodium phosphate, 0.5 M NaCl, 80  
393 mM imidazole, pH 8.0). After sonication, the cell lysate was collected by  
394 centrifugation (17500× g for 30 min at 4°C), filtered through a 0.45 μm membrane,  
395 and run on a HiTrap chelating HP column (Amersham Pharmacia Biotech). After  
396 washing with 20 column-volumes of binding buffer, the recombinant protein was  
397 eluted with a gradient of imidazole (80-500 mM) and dialysed against 50 mM Tris  
398 buffer (pH 7.6). The purity of the recombinant protein was judged by SDS-PAGE.  
399 The protein concentration was determined by the Bradford assay [59].

400

### 401 **Western blotting**

402 Mycelia were harvested and cellular proteins were extracted with lysis buffer (100  
403 mM Tris-HCl, 0.01% SDS, 1mM DTT, pH7.5). The supernatants were collected after  
404 centrifugation (13,000 rpm at 4°C for 10 min) and boiled for 5 min together with  
405 1×loading buffer to perform SDS-PAGE. Subsequently, separated proteins were  
406 further transferred onto PVDF membranes (Millipore). The membrane was blocked  
407 with 5% fat-free milk in TBST for 2 h at room temperature, and then incubated with

408 appropriate primary antibody at 4°C overnight. Then the membrane was washed three  
409 times with TBST buffer and incubated with an AP-conjugated secondary antibody for  
410 1 h at room temperature. After washing three times with TBST buffer, bands were  
411 detected with NBT/BCIP reagent.

412

#### 413 **Pull-down assay**

414 Overlapping PCR was performed with GST and *Afrp3*. The plasmid  
415 pVG2.2-GST-*Afrp3* was constructed in the same way as pVG2.2-*Afrp3*. CEA17  
416 containing pVG2.2-GST-*Afrp3* was cultured in CM for 24 h. Mycelia were harvested  
417 and intracellular proteins were extracted. For GST-pulldown experiments, protein  
418 extracts were subjected to Glutathione Sepharose 4B. The column was incubated at  
419 room temperature for 10 min. The eluate containing the GST-tagged protein was  
420 collected and boiled in 1×SDS loading buffer. Protein extracts were separated on a  
421 12% sodium dodecyl sulfate polyacrylamide gel and stained with Coomassie brilliant  
422 blue R250. The gel bands were cut from stained gel, destained and subjected to in-gel  
423 digestion with trypsin. The digested peptides were desalted with Hypersep C18 SPE  
424 cartridge (Thermo Scientific, Bellefonte, PA, USA), precipitated in 100 µL of 0.1%  
425 TFA and passed through the conditioned cartridge. The cartridge was washed three  
426 times with 1 mL of 0.1% TFA and the peptides were eluted twice with 1 mL of 0.1%  
427 TFA in 50% acetonitrile followed by evaporation to dryness in a Speed-Vac. Finally,  
428 the sample was resuspended in 0.1% FA (v/v) and analyzed by MALDI-TOF MS  
429 using SCIEX TOF/TOF™ 5800 mass spectrometer with laser frequency of 200 Hz at  
430 355 nm. Calibration of the mass spectrometer was performed using standard peptides.  
431 10-20 mg/mL of 2,5-dihydroxybenzoic acid (DHB) was taken as a dot-like matrix.  
432 The acceleration voltage was set to 2 kV. For each strain a triplicate was tested.

433

#### 434 **Immunoprecipitation**

435 The gene encoding open reading frame of translation elongation factor 1Bγ or  
436 adenylylsulfate kinase was amplified with the primer pairs of 5'-CGCGGATCCAT

437 GTCTTTCGGAACAATCTACTCCT/CCGCTCGAGTCAAGCCTTGGGAATCTC  
438 ACG-3' and 5'-CCCAAGCTTATGGCCACAAAATCACCTACCACG-3'/5'-AAA  
439 ACTGCAGCTACTCCTTCTTCGGAGGCAAATAC-3', respectively. The coding  
440 regions were subsequently cloned into a eukaryotic expression vector pXJ40-HA via  
441 *Bam*HI/*Xho*I, *Hind*III/*Pst*I restriction sites to get recombinant vector respectively.  
442 Transient expression of HA-eEF1B $\gamma$  tag or HA-ASK in HEK293 cells was transfected  
443 and cells were collected, lysed with 1 $\times$  lysis buffer (Cell Signaling Technology), and  
444 then lysates were centrifugated and incubated with *A/Rip3*-His protein and  
445 anti-His-tag mAb-Magnetic Beads for 4 h. The beads were exposed to a magnetic  
446 field, washed three times with IP buffer (50 mM Tris-HCl (pH7.4), 150 mM NaCl and  
447 1% Nonidet P40), boiled in 1 $\times$ SDS loading buffer for 5 min, and then analyzed by  
448 western blotting.

449

#### 450 **Acknowledgments**

451 This work was supported by the National Natural Science Foundation of China  
452 (31320103901 and 31630016).

453

#### 454 **Reference**

- 455 1. Yang Z and Klionsky DJ. Mammalian autophagy: core molecular machinery and  
456 signaling regulation. *Curr Opin Cell Biol.* 2010; 22(2): 124-131.
- 457 2. Proskuryakov SY, Konoplyannikov AG, Gabai VL. Necrosis: a specific form of  
458 programmed cell death? *Exp Cell Res.* 2003; 283(1): 1-16.
- 459 3. Golstein P and Kroemer G. Cell death by necrosis: towards a molecular  
460 definition. *Trends Biochem Sci.* 2007; 32(1): 37-43.
- 461 4. Festjens N, Vanden Berghe T, Vandenabeele P. Necrosis, a well-orchestrated  
462 form of cell demise: signalling cascades, important mediators and concomitant  
463 immune response. *Biochim Biophys Acta.* 2006; 1757(9-10): 1371-1387.
- 464 5. Cho YS, Challa S, Moquin D, Genga R, Ray TD, Guildford M, et al.  
465 Phosphorylation-driven assembly of the RIP1-RIP3 complex regulates  
466 programmed necrosis and virus-induced inflammation. *Cell.* 2009; 137(6):



- 467 1112-1123.
- 468 6. Scaffidi P, Misteli T, Bianchi ME. Release of chromatin protein HMGB1 by  
469 necrotic cells triggers inflammation. *Nature*. 2002; 418(6894): 191-195.
- 470 7. Vanden Berghe T, Kalai M, Denecker G, Meeus A, Saelens X, Vandenabeele P.  
471 Necrosis is associated with IL-6 production but apoptosis is not. *Cellular*  
472 *Signalling*. 2006; 18(3): 328-335.
- 473 8. Sridharan H and Upton JW. Programmed necrosis in microbial pathogenesis.  
474 *Trends Microbiol*. 2014; 22(4): 199-207.
- 475 9. Yu PW, Huang BC, Shen M, Quast J, Chan E, Xu X, et al. Identification of RIP3,  
476 a RIP-like kinase that activates apoptosis and NF kappa B. *Current Biology*.  
477 1999; 9(10): 539-542.
- 478 10. Li J, McQuade T, Siemer AB, Napetschnig J, Moriwaki K, Hsiao YS, et al. The  
479 RIP1/RIP3 necrosome forms a functional amyloid signaling complex required for  
480 programmed necrosis. *Cell*. 2012; 150(2): 339-350.
- 481 11. He SD, Wang L, Miao L, Wang T, Du F, Zhao L, et al. Receptor interacting  
482 protein kinase-3 determines cellular necrotic response to TNF-alpha. *Cell*. 2009;  
483 137(6): 1100-1111.
- 484 12. He S, Huang S, Shen Z. Biomarkers for the detection of necroptosis. *Cell Mol*  
485 *Life Sci*. 2016; 73(11-12):2177-2181.
- 486 13. Sun L, Wang H, Wang Z, He S, Chen S, Liao D, et al. Mixed lineage kinase  
487 domain-like protein mediates necrosis signaling downstream of RIP3 kinase.  
488 *Cell*. 2012; 148(1-2): 213-227.
- 489 14. Wang H, Sun L, Su L, Rizo J, Liu L, Wang LF, et al. Mixed lineage kinase  
490 domain-like protein MLKL causes necrotic membrane disruption upon  
491 phosphorylation by RIP3. *Mol Cell*. 2014; 54(1): 133-46.
- 492 15. Zhang DW, Shao J, Lin J, Zhang N, Lu BJ, Lin SC, et al. RIP3, an energy  
493 metabolism regulator that switches TNF-induced cell death from apoptosis to  
494 necrosis. *Science*. 2009; 325(5938): 332-336.
- 495 16. Moujalled DM, Cook WD, Okamoto T, Murphy J, Lawlor KE, Vince JE, et al.  
496 TNF can activate RIPK3 and cause programmed necrosis in the absence of

- 497 RIPK1. *Cell Death Disease*. 2013; 4:e465.
- 498 17. Latgé JP. The pathobiology of *Aspergillus fumigatus*. *Trends Microbiol*. 2001; 9:  
499 382–389.
- 500 18. Latgé, J. P. *Aspergillus fumigatus* and aspergillosis. *Clin Microbiol Rev*. 1999;  
501 12: 310–350.
- 502 19. Zmeili OS and Soubani AO. Pulmonary aspergillosis: a clinical update. *Q J Med*.  
503 2007; 100: 317-334.
- 504 20. Brown GD, Denning DW, Gow NA, Levitz SM, Netea MG, White TC. Hidden  
505 killers: human fungal infections. *Sci Transl Med*. 2012; 4: 165rv113.
- 506 21. Walsh TJ, Anaissie EJ, Denning DW, Herbrecht R, Kontoyiannis DP, Marr KA,  
507 et al. Treatment of aspergillosis: clinical practice guidelines of the Infectious  
508 Diseases Society of America. *Clin Infect Dis*. 2008; 46: 327–360
- 509 22. Anderson JB. Evolution of antifungal-drug resistance: mechanisms and pathogen  
510 fitness. *Nat Rev Microbiol*. 2005; 3: 547-556.
- 511 23. Spanakis EK, Aperis G, Mylonakis E. New agents for the treatment of fungal  
512 infections: clinical efficacy and gaps in coverage. *Clin Infect Dis*. 2006; 43:  
513 1060-1068.
- 514 24. Denning DW and Bromley MJ. How to bolster the antifungal pipeline. *Science*.  
515 2015; 347(6229): 1414-1416.
- 516 25. Matsuyama S, Nouraini S, Reed JC. Yeast as a tool for apoptosis research. *Curr*  
517 *Opin Microbiol*. 1999; 2(6): 618-23.
- 518 26. Lam E. Controlled cell death, plant survival and development. *Nat Rev Mol Cell*  
519 *Biol*. 2004; 5(4): 305-315.
- 520 27. Golstein P, Aubry L, Levraud JP. Cell-death alternative model organisms: why  
521 and which? *Nat Rev Mol Cell Biol*. 2003; 4(10): 798-807.
- 522 28. Engelberg-Kulka H, Amitai S, Kolodkin-Gal I, Hazan R. Bacterial programmed  
523 cell death and multicellular behavior in bacteria. *Plos Genetics*. 2006; 2(10):  
524 1518-1526.
- 525 29. Mousavi SAA and Robson GD. Entry into the stationary phase is associated with  
526 a rapid loss of viability and an apoptotic-like phenotype in the opportunistic

- 527 pathogen *Aspergillus fumigatus*. Fung Genet Biol. 2003; 39(3): 221-229.
- 528 30. Yan J, Du T, Zhao W, Hartmann T, Lu H, Lü Y, et al. Transcriptome and  
529 biochemical analysis reveals that suppression of GPI-anchor synthesis leads to  
530 autophagy and possible necroptosis in *Aspergillus fumigatus*. PlosOne. 2013;  
531 8(3).
- 532 31. Meyer V, Wanka F, van Gent J, Arentshorst M, van den Hondel C A, Ram AF.  
533 Fungal gene expression on demand: an inducible, tunable, and  
534 metabolism-independent expression system for *Aspergillus niger*. Appl Environ  
535 Microbiol. 2011; 77(9): 2975-2983.
- 536 32. Vogt K, Bhabhra R, Rhodes JC, Askew DS. Doxycycline-regulated gene  
537 expression in the opportunistic fungal pathogen *Aspergillus fumigatus*. BMC  
538 Microbiol. 2005; 5: 1, DOI:[10.1186/1471-2180-5-1](https://doi.org/10.1186/1471-2180-5-1).
- 539 33. Yelton MM, Hamer JE, Timberlake WE. Transformation of *Aspergillus nidulans*  
540 by using a trpC plasmid. Proc Natl Acad Sci U S A. 1984; 81(5): 1470-1474.
- 541 34. Brana C, Benham C, Sundstrom L. A method for characterising cell death in vitro  
542 by combining propidium iodide staining with immunohistochemistry. Brain  
543 Research Protocols. 2002; 10(2): 109-114.
- 544 35. Hailer NP, Vogt C, Korf HW, Dehghani F. Interleukin-1 beta exacerbates and  
545 interleukin-1 receptor antagonist attenuates neuronal injury and microglial  
546 activation after excitotoxic damage in organotypic hippocampal slice cultures.  
547 Eur J Neurosci. 2005; 21(9): 2347-2360.
- 548 36. Miller LDP, Mahanty NK, Connor JA, Landis DM. Spontaneous pyramidal  
549 cell-death in organotypic slice cultures from rat hippocampus is prevented by  
550 glutamate-receptor antagonists. Neurosci. 1994; 63(2): 471-487.
- 551 37. Danial NN and Korsmeyer SJ. Cell death: Critical control points. Cell. 2004;  
552 116(2): 205-219.
- 553 38. Gardai SJ, Bratton DL, Ogden CA, Henson PM. Recognition ligands on apoptotic  
554 cells: a perspective. J Leukoc Biol. 2006; 79(5): 896-903.
- 555 39. Eskelinen EL. New insights into the mechanisms of macroautophagy in  
556 mammalian cells. Int Rev Cell Mol Biol. 2008; 266: 207-247.

- 557 40. Xie X, Zhao Y, Ma CY, Xu XM, Zhang YQ, Wang CG, et al. Dimethyl fumarate  
558 induces necroptosis in colon cancer cells through GSH depletion/ROS  
559 increase/MAPKs activation pathway. *British J Pharmacol.* 2015; 172(15):  
560 3929-3943.
- 561 41. Tanida I. Autophagosome formation and molecular mechanism of autophagy.  
562 *Antioxid Redox Signal.* 2011; 14(11): 2201-2214.
- 563 42. Ventura JJ, Cogswell P, Flavell RA, Baldwin AS Jr, Davis RJ. JNK potentiates  
564 TNF-stimulated necrosis by increasing the production of cytotoxic reactive  
565 oxygen species. *Genes Dev.* 2004; 18(23): 2905-2915.
- 566 43. Xu Y, Huang S, Liu ZG, Han J. Poly(ADP-ribose) polymerase-1 signaling to  
567 mitochondria in necrotic cell death requires RIP1/TRAF2-mediated JNK1  
568 activation. *J Biol Chem.* 2006; 281(13): 8788-8795.
- 569 44. Antosiewicz J, Ziolkowski W, Kaczor JJ, Herman-Antosiewicz A. Tumor  
570 necrosis factor-alpha-induced reactive oxygen species formation is mediated by  
571 JNK1-dependent ferritin degradation and elevation of labile iron pool. *Free Radic*  
572 *Biol Med.* 2007; 43(2): 265-270.
- 573 45. Won JS and Singh I. Sphingolipid signaling and redox regulation. *Free Radic*  
574 *Biol Med.* 2006; 40(11): 1875-1888.
- 575 46. Mao C and Obeid LM. Ceramidases: regulators of cellular responses mediated by  
576 ceramide, sphingosine, and sphingosine-1-phosphate. *Biochim Biophys Acta.*  
577 2008; 1781(9): 424-34.
- 578 47. Orrenius S, Gogvadze V, Zhivotovsky B. Mitochondrial oxidative stress:  
579 implications for cell death. *Annu Rev Pharmacol Toxicol.* 2007; 47: 143-183.
- 580 48. He SD, Liang Y, Shao F, Wang X. Toll-like receptors activate programmed  
581 necrosis in macrophages through a receptor-interacting kinase-3-mediated  
582 pathway. *Proc Natl Acad Sci U S A.* 2011; 108(50): 20054-20059.
- 583 49. Vanlangenakker N, Bertrand MJ, Bogaert P, Vandenabeele P, Vanden Berghe T.  
584 TNF-induced necroptosis in L929 cells is tightly regulated by multiple TNFR1  
585 complex I and II members. *Cell Death Disease.* 2011; 2 :e230, doi:  
586 10.1038/cddis.2011.111.

- 587 50. Kaiser WJ, Sridharan H, Huang C, Mandal P, Upton JW, Gough PJ, et al.  
588 Toll-like receptor 3-mediated necrosis via TRIF, RIP3, and MLKL. *J Biol Chem.*  
589 2013; 288(43): 31268-31279.
- 590 51. Khan MJ, Rizwan AM, Waldeck-Weiermair M, Karsten F, Groschner  
591 L, Riederer, M, et al. Inhibition of autophagy rescues palmitic acid-induced  
592 necroptosis of endothelial cells. *J Biol Chem.* 2012; 287(25): 21110-21120.
- 593 52. Ono K, Kim SO, Han JH. Susceptibility of lysosomes to rupture is a determinant  
594 for plasma membrane disruption in tumor necrosis factor alpha-induced cell  
595 death. *Mol Cell Biol.* 2003; 23(2): 665-676.
- 596 53. Crawford SE and Estes MK. Viroporin-mediated calcium-activated autophagy.  
597 *Autophagy.* 2013; 9(5): 797-8.
- 598 54. Medina DL and Ballabio A. Lysosomal calcium regulates autophagy. *Autophagy.*  
599 2015; 11(6): 970-971.
- 600 55. Halachmi D and Eilam Y. Calcium homeostasis in yeast cells exposed to high  
601 concentration of calcium: Roles of vacuolar H-ATPase and cellular ATP. *FEBS*  
602 *Lett.* 1993; 316(1): 73-78.
- 603 56. Murphy JM, Czabotar PE, Hildebrand JM, Lucet IS, Zhang JG, Alvarez-Diaz  
604 S, et al. The pseudokinase MLKL mediates necroptosis via a molecular switch  
605 mechanism. *Immunity.* 2013; 39(3): 443-453.
- 606 57. Schiene-Fischer C. Multidomain peptidyl prolyl cis/trans isomerases. *Biochim*  
607 *Biophys Acta.* 2015; 1850(10): 2005-2016.
- 608 58. Nakagawa T, Shimizu S, Watanabe T, Yamaguchi O, Otsu K, Yamagata H, et al.  
609 Cyclophilin D-dependent mitochondrial permeability transition regulates some  
610 necrotic but not apoptotic cell death. *Nature.* 2005; 434(7033): 652-658.
- 611 59. Bradford MM. A rapid and sensitive method for the quantitation of microgram  
612 quantities of protein utilizing the principle of protein-dye binding. *Anal Biochem.*  
613 1976; 72: 248-254.

614 **Supporting information captions**

615 **S1 Table. Pull-down proteins identified by Mass Spectrum.** *A. fumigatus* CEA17  
616 was transformed with pVG2.2-GST-Afrp3 and cultured in CM for 24 h. Mycelia  
617 were harvested and intracellular proteins were extracted. Protein extracts were  
618 subjected to Glutathione Sepharose 4B. The column was incubated at room  
619 temperature for 10 min. The eluate containing the GST-tagged proteins was collected  
620 and boiled in 1×SDS loading buffer. Protein extracts were separated on a 12%  
621 SDS-PAGE gel and stained with Coomassie brilliant blue R250. The gel bands were  
622 cut from stained gel, destained and subjected to in-gel digestion with trypsin. The  
623 digested peptides were analyzed by MALDI-TOF MS as described under Materials  
624 and methods.

625

626 **S2 Table. Primers used in this study.** Quantitative RT-PCR was carried out in a  
627 CFX960 (Bio-Rad, USA) using the primers (0.5 μM), 1 μL cDNA, 10 μL ChamQ  
628 SYBR qPCR Master Mix (Vazyme) in a final volume of 20 μL. Cycle conditions  
629 were 95°C for 5 min for the first cycle, followed by 45 cycles of 95°C for 10 s, 60°C  
630 for 15 s, and 72°C for 1 s. Quantification of mRNA levels of different genes was  
631 performed using the  $2^{-\Delta\Delta ct}$  method. Triplicates of samples were analyzed in each  
632 assay, and each experiment was repeated at least three times.

633

634 **Figure legends**

635 **Fig 1. Construction of OE-*Afrip3* strain.** In A, PCR confirmation of the OE-*Afrip3*  
636 strain was carried by using a primer pair of 5'-ATAGGGCATATTCAACT  
637 ACCTGGCT-3' and 5'-GTTTATAGACTCTCAATTCGCGATC-3' to amplify an  
638 863-bp fragment of the *Afrip3* gene as described under Materials and Methods; in B,  
639 quantitative RT-PCR was carried out by using 1 µg RNA isolated from strains as  
640 described under Materials and Methods. Quantification of mRNA was performed  
641 using the  $2^{-\Delta\Delta ct}$  method. Triplicates of samples were analyzed in each assay, and each  
642 experiment was repeated at least three times. Results are presented as mean  $\pm$  SD.

643

644 **Fig 2. Detection of cell death in OE-*Afrip3* strain.** Strains were cultured at 37°C for  
645 24 h. The mycelia were collected by centrifugation at 8,000 rpm at 4°C. The  
646 supernatant was thoroughly removed. Sterile filtered solution containing 30 µg/mL  
647 propidium iodide (PI) in phosphate-buffered saline (137 mM NaCl, 2.7 mM KCl, 4.3  
648 mM Na<sub>2</sub>HPO<sub>4</sub>•7H<sub>2</sub>O, and 1.4 mM KH<sub>2</sub>PO<sub>4</sub>) was added to the tube. After standing at  
649 room temperature for 5 min, the hyphae were washed by PBS buffer for 3 times and  
650 visualized under the fluorescent microscope.

651

652 **Fig 3. Determination of CasA activity and surface-exposed phosphatidylserine.** In  
653 A, strains were cultivated with or without dexamethasone. Intracellular proteins were  
654 extracted for activity assay. Caspase activity was determined using Caspase  
655 Fluorescent (AMC) Substrate/Inhibitor QuantiPak™ (BioMol International). The  
656 results are represented as the mean  $\pm$  SD of three replicates. In B, after cultured in CM  
657 for 24 h, the mycelia were collected and washed with PBS three times. The mycelia  
658 were resuspend in 500 µL PBS and detected with Annexin V-FITC Apoptosis  
659 Detection Kit (Sigma) under microscope (Zeiss).

660

661 **Fig 4. Determination of LC3 in OE-*Afrip3* strain.** Proteins were separated on  
662 SDS-PAGE and transferred onto PVDF membranes (Millipore). The membrane was  
663 blocked with 5% fat-free milk in TBST for 2 h at room temperature, and then  
664 incubated with anti-LC3I (A) or anti-LC3 II (B) antibody (Sigma) at 4°C overnight.

665 Then the membrane was washed three times with TBST buffer and incubated with an  
666 AP-conjugated secondary antibody for 1 h at room temperature. After washing three  
667 times with TBST buffer, bands were detected with NBT/BCIP reagent.

668

669 **Fig 5. Transmission electron microscopy of OE-Afrip3 strain.** After cultivation in  
670 CM for 24 h, mycelia were collected, suspended in PBS and fixed overnight at 4°C in  
671 2.5% (w/v) glutaraldehyde. The samples were post-fixed with 1% (w/v) osmium  
672 tetroxide solution for 2h at room temperature, dehydrated in an acetone series (30, 50,  
673 70, 85, 95 and 100%) and subjected to 2% uranyl acetate and 30% methanol. Samples  
674 were embedded in Spurr's plastic and sectioned with a diamond knife. Thin sections  
675 were placed on copper grids and stained with uranyl acetate and lead citrate, and  
676 examined under an FEI Tecnai Spirit transmission electron microscope (FEI, Hillsboro,  
677 OR, USA)

678

679 **Fig 6. Release of intracellular lactate dehydrogenase and membrane protein**  
680 **Ecm33 in OE-Afrip3 strain.** Extracellular proteins were extracted as described under  
681 Material and Methods. In A, the activity of released lactate dehydrogenase (LDH) was  
682 determined by LDH Release Assay Kit (Beyotime, China). The absorbance was read  
683 at 490 nm. The results are represented as the mean  $\pm$  SD of three replicates. In B,  
684 Extracellular proteins from either WT or OE-Afrip3 strain were separated on  
685 SDS-PAGE and transferred onto PVDF membranes (Millipore). The membrane was  
686 blocked with 5% fat-free milk in TBST for 2 h at room temperature, and then  
687 incubated with anti-Ecm33 antibody at 4°C overnight. Then the membrane was  
688 washed three times with TBST buffer and incubated with an AP-conjugated  
689 secondary antibody for 1 h at room temperature. After washing three times with  
690 TBST buffer, bands were detected with NBT/BCIP reagent.

691

692 **Fig 7. Construction and analysis of the  $\Delta$ Afrip3 mutant.** The null mutant  $\Delta$ Afrip3  
693 was constructed by replacing of Afrip3 gene with *pyrG* as described under Materials  
694 and Methods. The mutant was confirmed by PCR and Southern blot (A and B).  $1 \times 10^6$   
695 of the WT or mutant spores were inoculated into 1 ml liquid CM with (+) or without



696 (-) 1  $\mu$ l TSZ and incubated at 37°C for 4 hours, stained with 5  $\mu$ l Hoechst33342 and 5  
697  $\mu$ l propidium iodide (PI) at 4°C for 20 minutes (Apoptosis and Necrosis Assay Kit,  
698 C1056, Beyotime, China), and then examined under the fluorescence microscope  
699 (Zeiss Imager A2, Zeiss, Japan). WT: wild-type; PI: propidium iodide; TSZ, mixture  
700 of TNF- $\alpha$ , SM-164 and Z-VAD-FMK (Necroptosis Inducer Kit, C1058S, Beyotime,  
701 China). Scale bar: 20 $\mu$ m.

702

703 **Fig 8. Effect of Ca<sup>2+</sup> on the programmed cell death (PCD) of *A. fumigatus*.** 2 $\times$ 10<sup>8</sup>  
704 spores were cultured in culture medium supplied with CaCl<sub>2</sub> at 37°C for 24 h. RNAs  
705 were extracted and quantified as described under Materials and Methods. In A, the  
706 expression levels of *Afrip3* were determined with RNAs extracted from the  
707 OE-*Afrip3* strain cultured with different concentrations of CaCl<sub>2</sub>; in B, expression  
708 levels of glutamate dehydrogenase1 (GLUD1), glutamate-ammonia ligase (GLUL),  
709 glycogen phosphorylase (PYGL), c-Jun NH<sub>2</sub>-terminal kinase 1 (JNK1) and  
710 sphingomyelinase (SMase) were determined with RNAs extracted from the  
711 OE-*Afrip3* strain cultured with 0.1 mM of CaCl<sub>2</sub>, respectively; and in C, expression  
712 level of the gene encoding Vps34/PtdIns3K was determined with RNAs extracted  
713 from the OE-*Afrip3* strain cultured with 0.1 mM of CaCl<sub>2</sub>. The results are represented  
714 as the mean $\pm$ SD of three replicates.

715

716 **Fig 9. Detection of ROS in OE-*Afrip3* strain.** The WT and OE-*Afrip3* strain were  
717 cultured in CM for 24h, stained by dihydroethidium and visualized under fluorescence  
718 microscope.

719

720 **Fig 10. Identification and confirmation of proteins that potentially interact with**  
721 ***AfRip3*.** In A, expression and confirmation of GST-*AfRip3* protein in *A. fumigatus*  
722 under Materials and Methods; in B, GST-*AfRip3* protein was bound to GST<sup>TM</sup> 4B  
723 column with a flow rate of 0.2 mL/min to allow full interaction of GST-*AfRip3*  
724 protein. Binding proteins were separated on SDS-PAGE and stained with coomassie  
725 blue; in C, *AfRip3*-His was expressed in *E. coli* BL21 (Rossetta) under Materials and

726 Methods. eEF1B $\gamma$  or adenylylsulfate kinase (ASK) fused with HA tag was expressed  
727 in human embryonic kidney cells 293 under Materials and Methods. Cell lysate was  
728 immunoprecipitated with anti-His antibody and subsequently probed with anti-HA  
729 antibody.  
730

731 **Tables**

732 **Table 1. Expression of necroptosis-related genes in OE-Afrp3 strain.**

| Protein required for necroptosis | Locus tag in <i>A. fumigatus</i> genome | Protein in <i>A. fumigatus</i>                             | Fold change in the <i>afpig-a</i> Mutant <sup>a</sup> | Fold change in the OE-Afrp3 strain <sup>b</sup> |
|----------------------------------|-----------------------------------------|------------------------------------------------------------|-------------------------------------------------------|-------------------------------------------------|
| SMase                            | AFUA_2G01600                            | sphingomyelin phosphodiesterase                            | -2.1                                                  | 5.9                                             |
| JNK1                             | AFUA_1G12940                            | MAP kinase Saka                                            | 1.6                                                   | 2.7                                             |
| PYGL                             | AFUA_1G12920                            | glycogen phosphorylase GlpV/Gph1                           | 3.3                                                   | 0.1                                             |
| GLUL                             | AFUA_6G03530                            | glutamine synthetase                                       | 1.5                                                   | 0.6                                             |
| GLUD1                            | AFUA_2G06000                            | NAD <sup>+</sup> dependent glutamate dehydrogenase         | 2.2                                                   | 0.4                                             |
| Hsp70                            | AFUA_8G03930                            | Hsp70 chaperone (HscA)/ heat shock protein SSB/spliceosome | 2.7                                                   | 0.3                                             |
|                                  | AFUA_2G04620                            | Hsp70 chaperone BiP/Kar2                                   | 2.0                                                   | 2.5                                             |
|                                  | AFUA_2G02320                            | Hsp70 chaperone (BiP)                                      | 1.8                                                   | 1.8                                             |
|                                  | AFUA_7G08575                            | Hsp70 family chaperone                                     | 172                                                   | 0.1                                             |
| AIF                              | AFUA_7G02070                            | AIF-like mitochondrial oxidoreductase Nfrl                 | 7.1                                                   | 8.4                                             |
| ANT                              | AFUA_1G05390                            | mitochondrial ADP, ATP carrier protein Ant                 |                                                       | 0.2                                             |
| Cyclophilin family CYPD          | AFUA_8G03890                            | Peptidyl-prolyl cis-trans isomerase H                      | 2.0                                                   | 2.1                                             |
|                                  | AFUA_3G07430                            | peptidyl-prolyl cis-trans isomerase/cyclophilin            | 2.8                                                   | 2.9                                             |
|                                  | AFUA_1G01750                            | peptidyl-prolyl cis-trans isomerase                        | 1.5                                                   | 4.6                                             |
|                                  | AFUA_6G02140                            | peptidyl prolyl cis-trans isomerase (CypC)                 | 2.3                                                   | 1.1                                             |
| Glyoxalase                       | AFUA_7G05015                            | glyoxalase family protein                                  | 7.1                                                   | 0.7                                             |
|                                  | AFUA_3G06020                            | glyoxalase family protein                                  | 4.9                                                   | 4.4                                             |
| Rab7/Ypt7                        | AFUA_5G12130                            | Rab small monomeric GTPase Rab7                            | 1.6                                                   | 0.4                                             |
| PKA                              | AFUA_1G06400                            | cAMP-dependent protein kinase-like                         | 1.8                                                   | 0.8                                             |
| ceramidase                       | AFUA_4G12330                            |                                                            | n                                                     |                                                 |

733 <sup>a</sup> Data from microarray analysis of the *afpig-a* mutant [30]; <sup>b</sup> Expression of the genes  
734 that are differentially expressed in the *afpig-a* mutant were analyzed by RT-PCR as  
735 described under Materials and Methods. The primers used are listed in supplemental  
736 S2 Table.

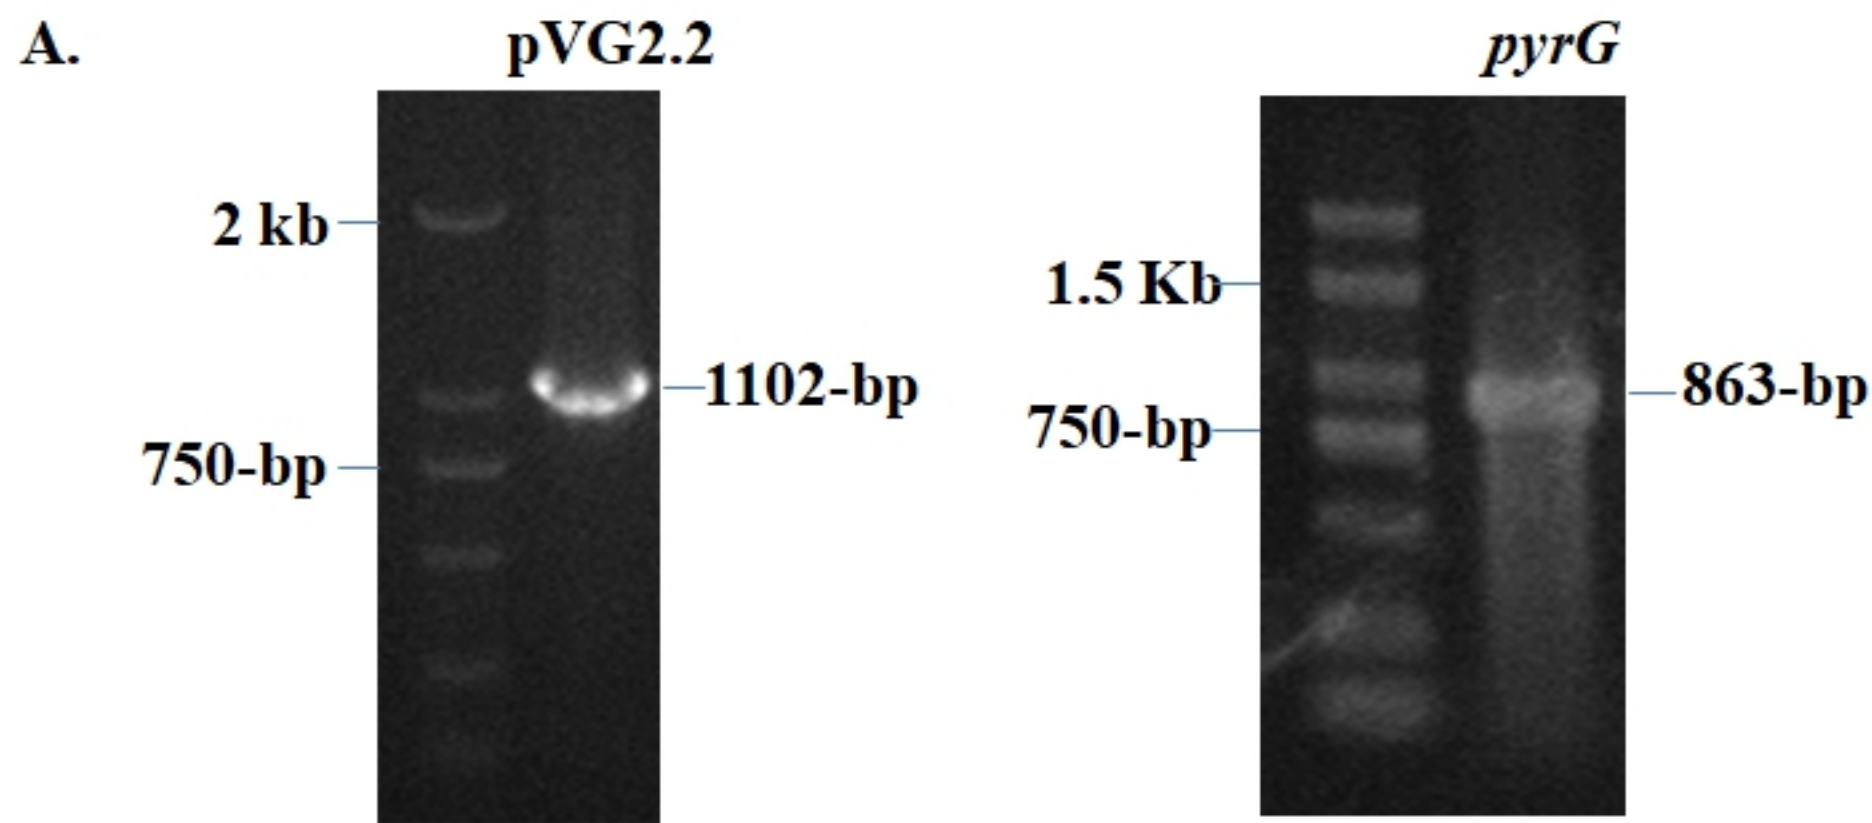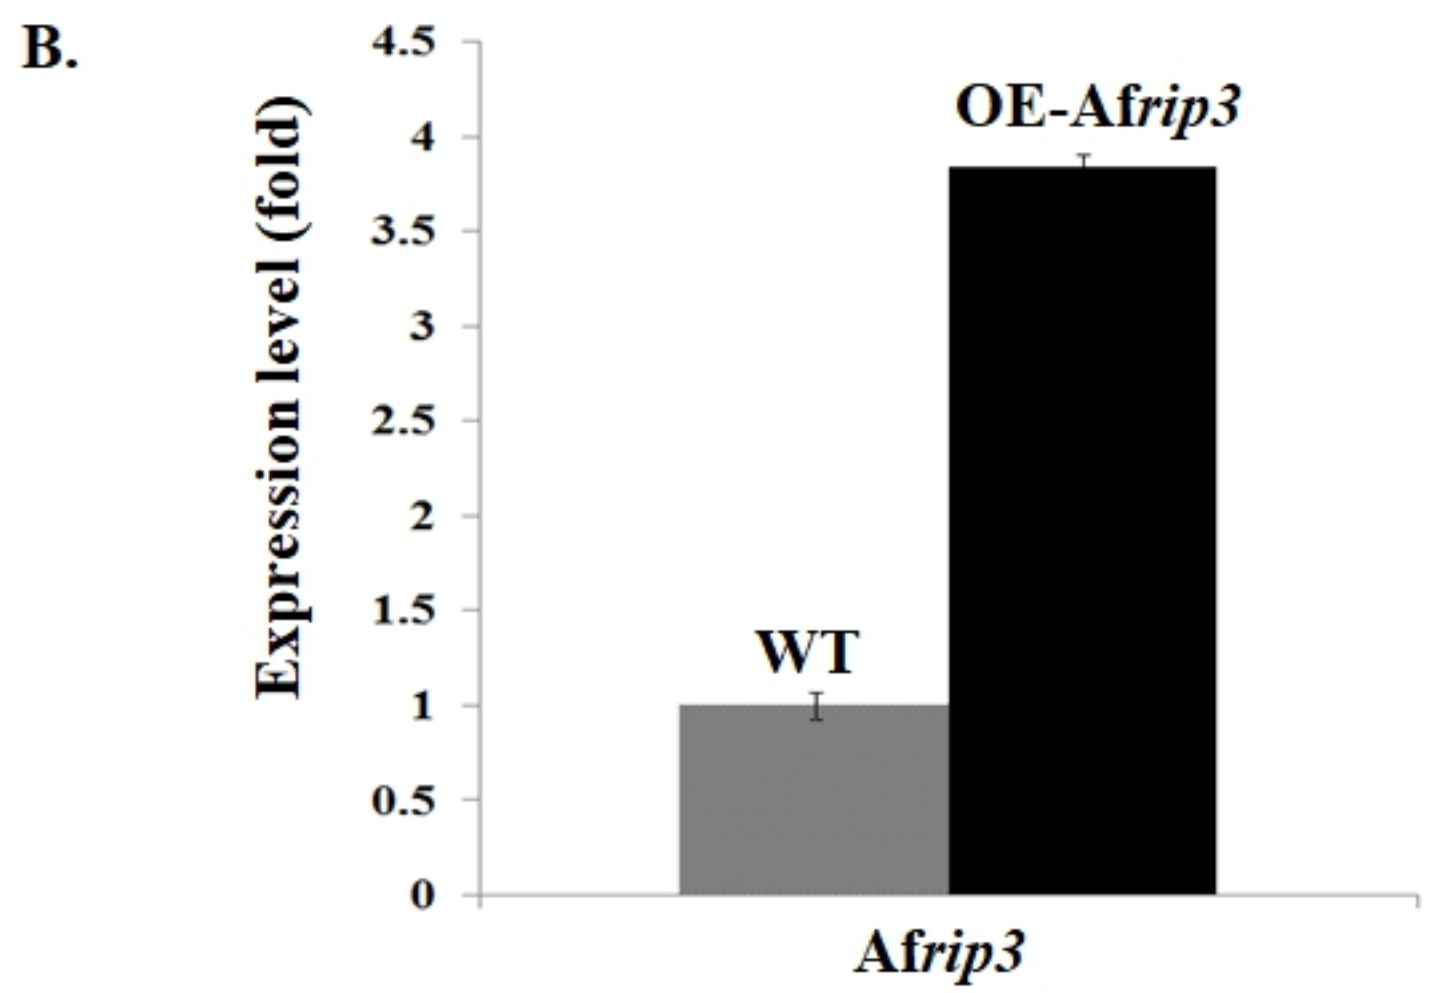

Figure-1

**Wild-type**

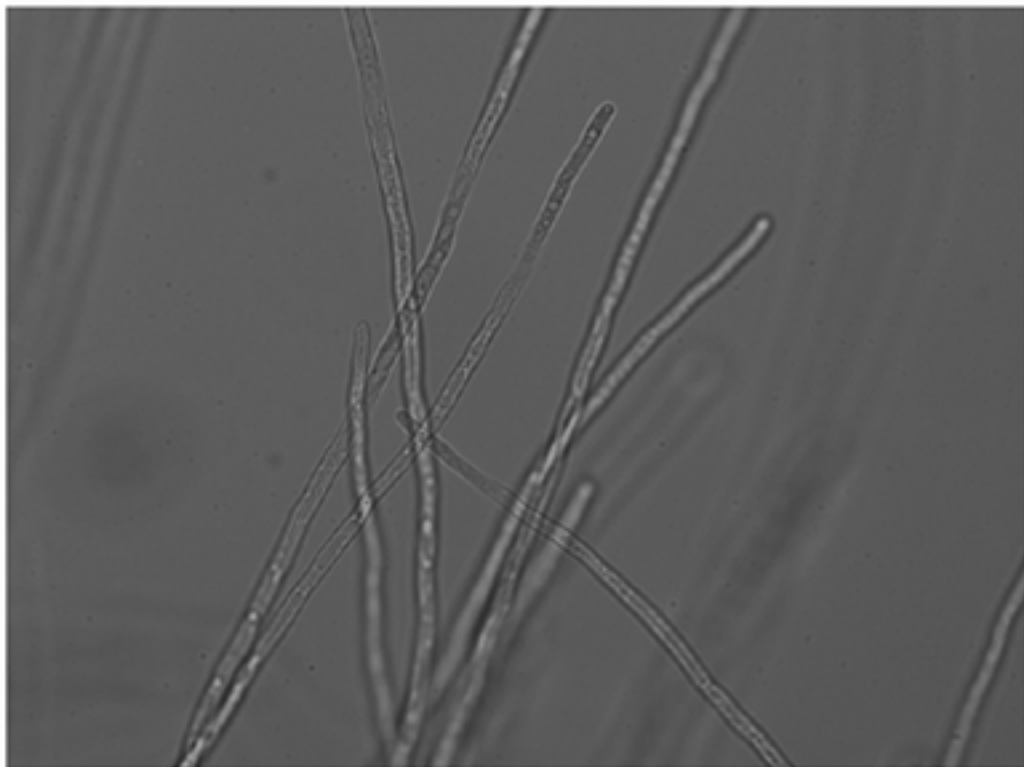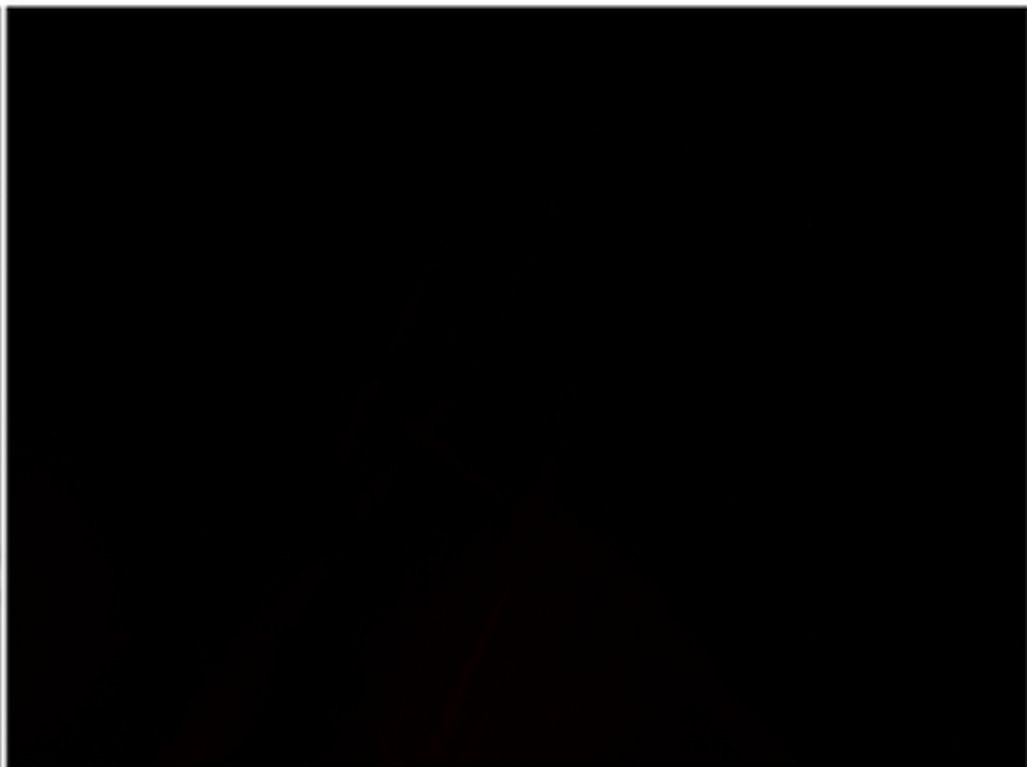

**OE-Afrip3**

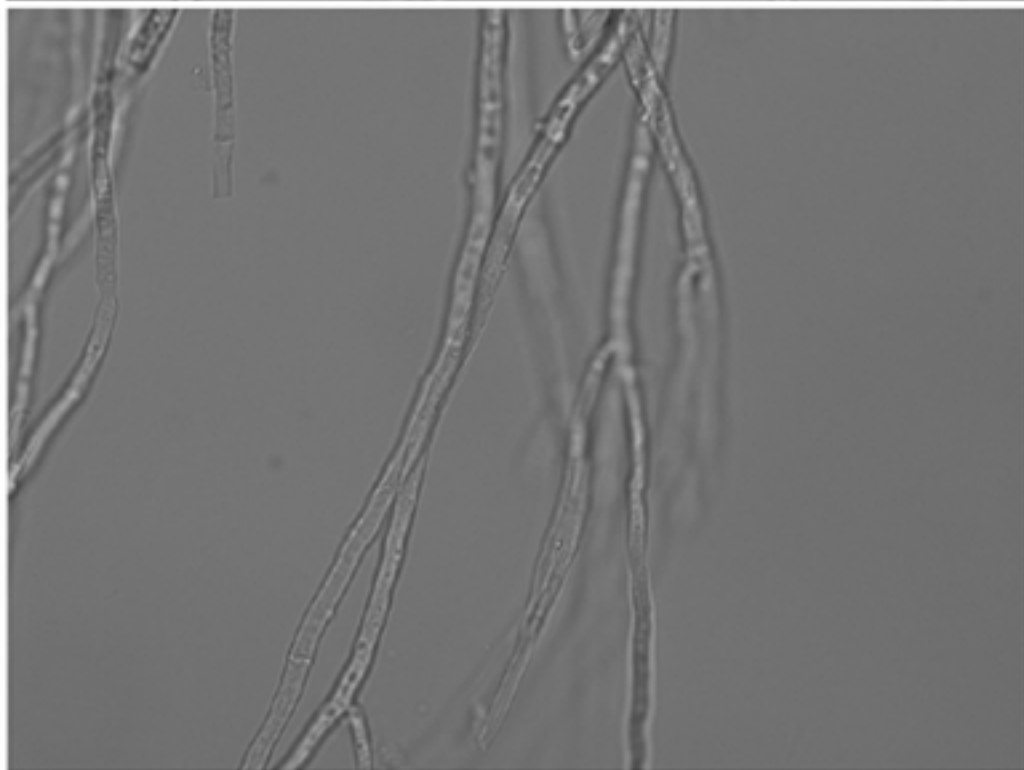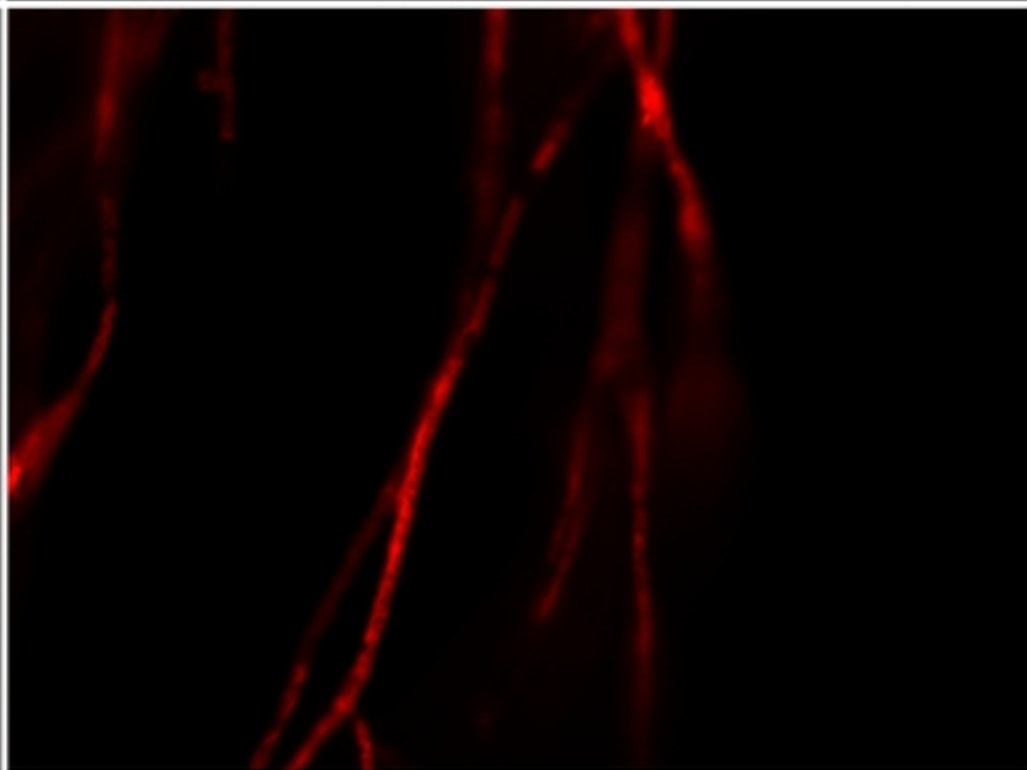

Figure-2

**A.**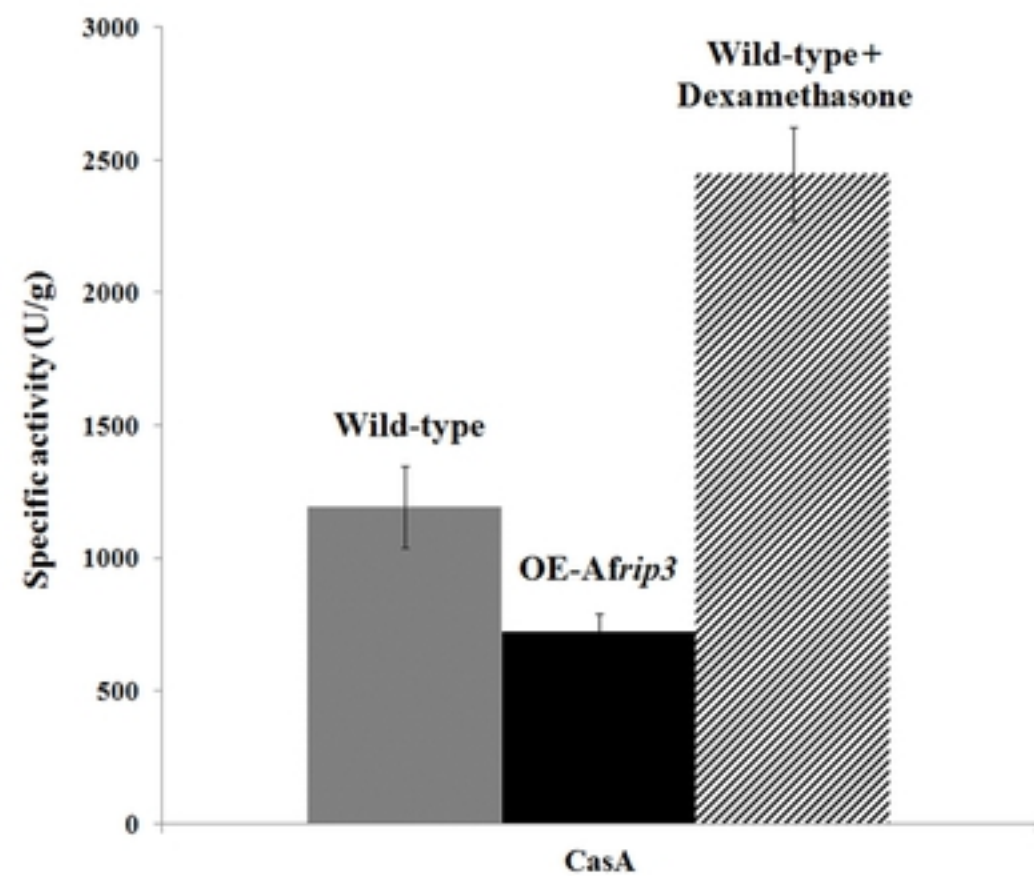**B.**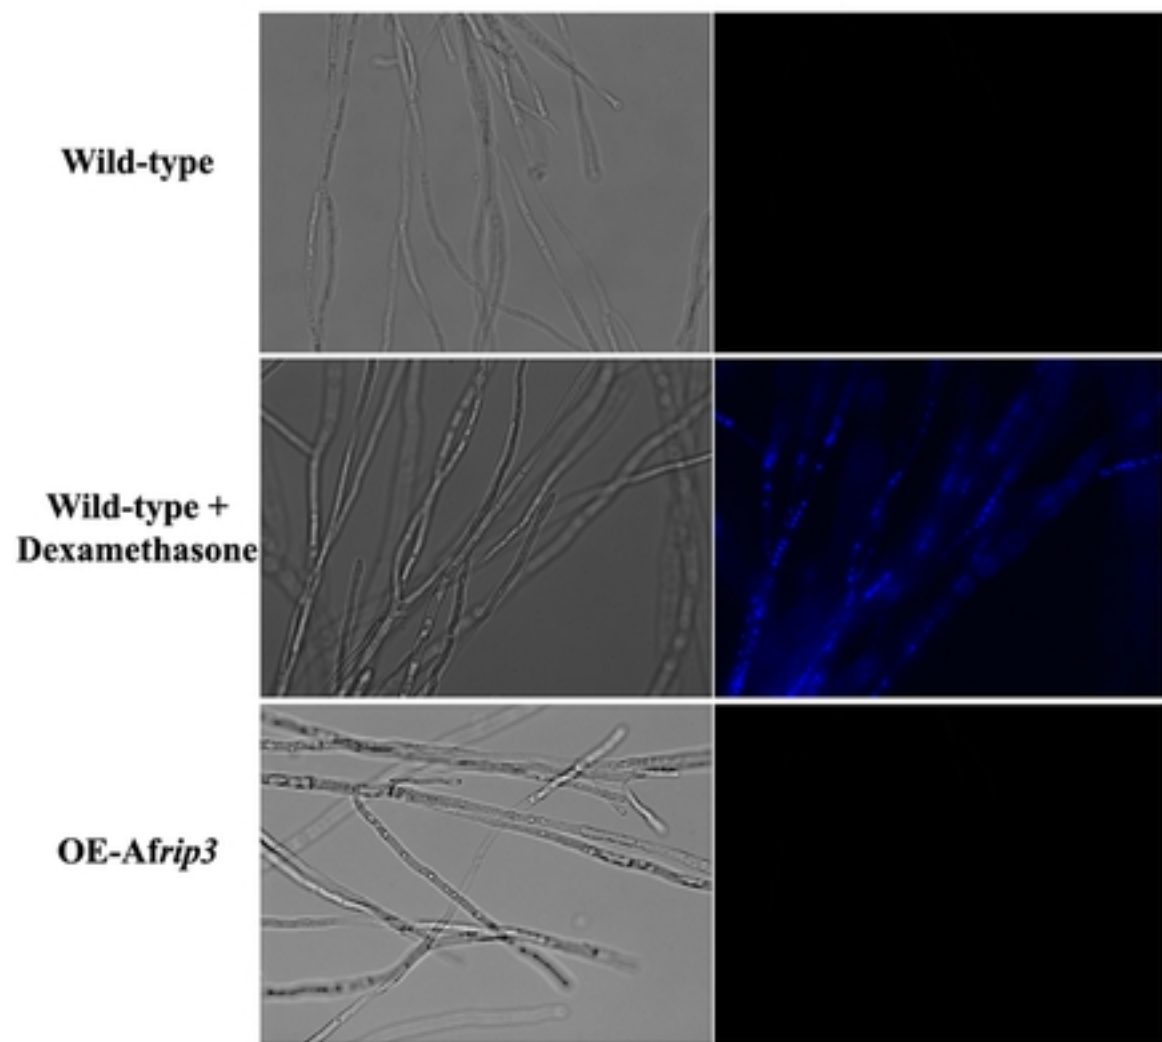**Figure-3**

**A**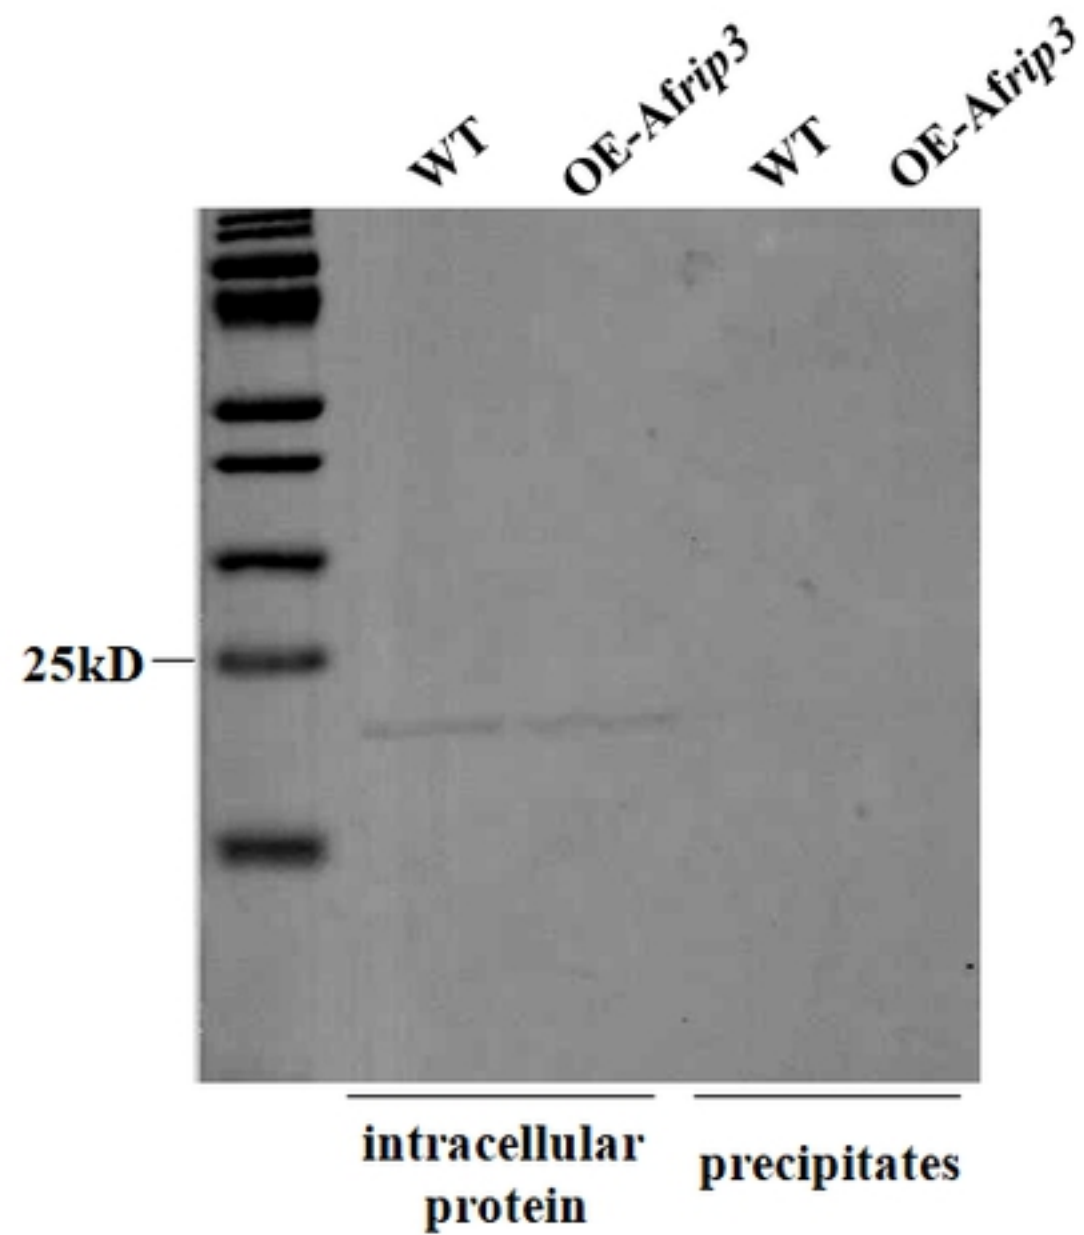**B**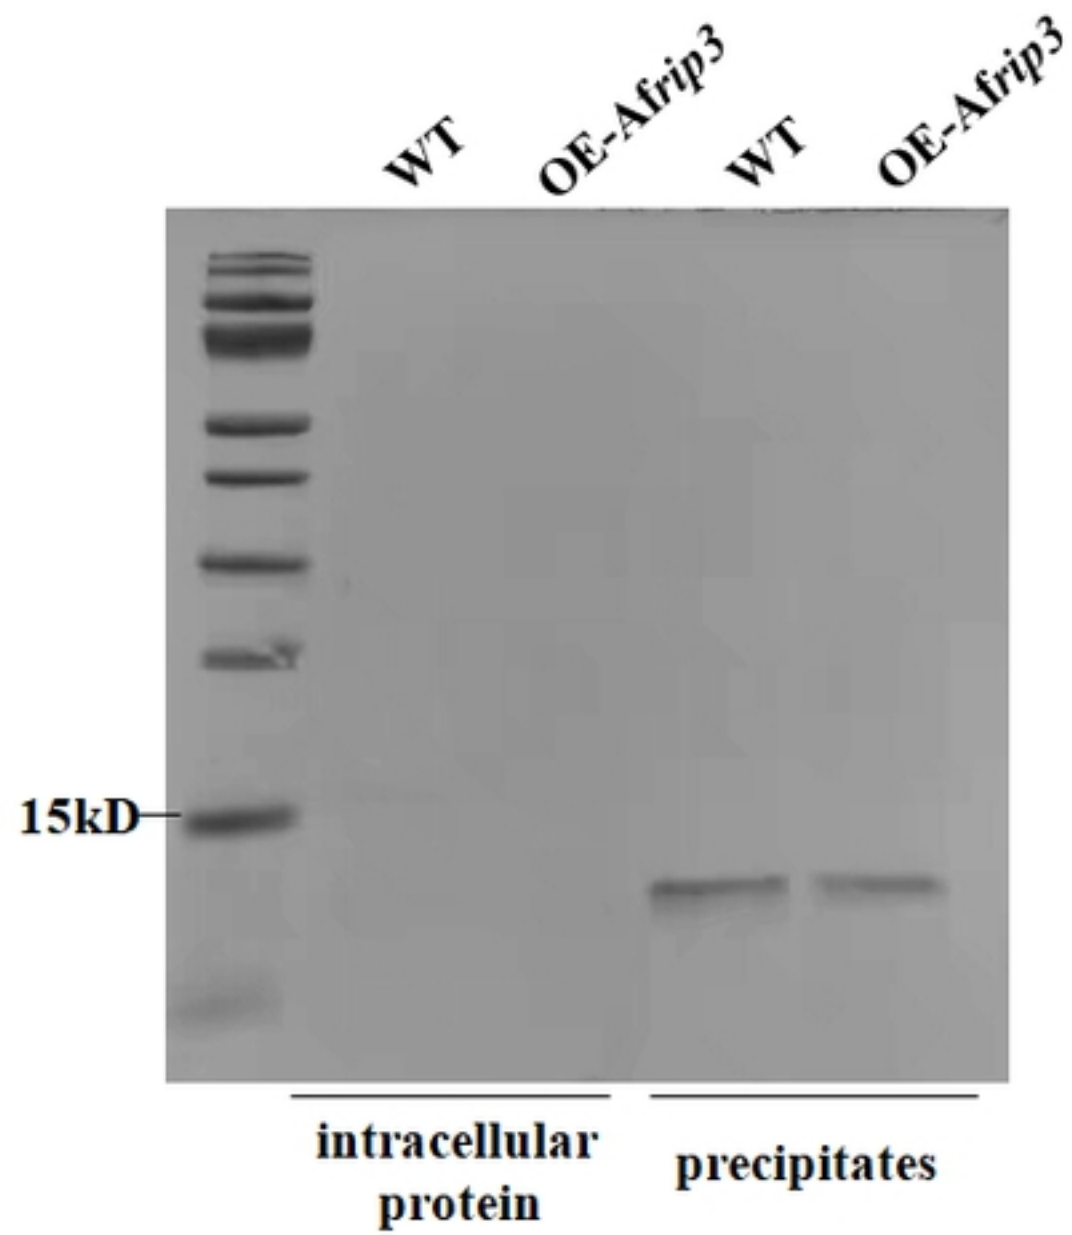

Figure-4

**Wild-type**

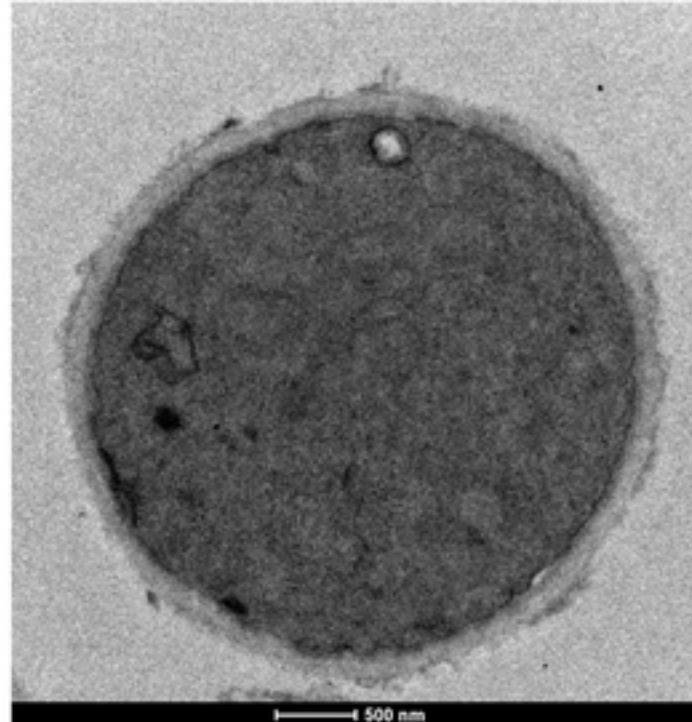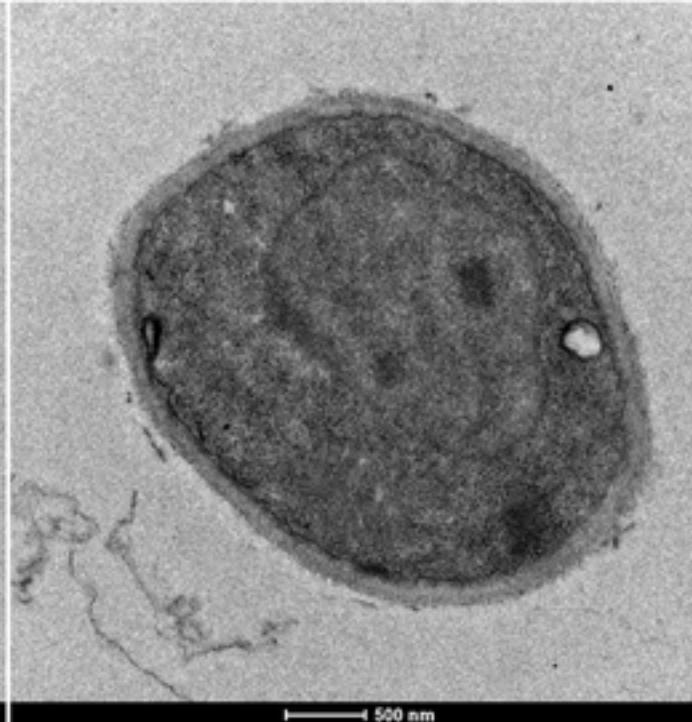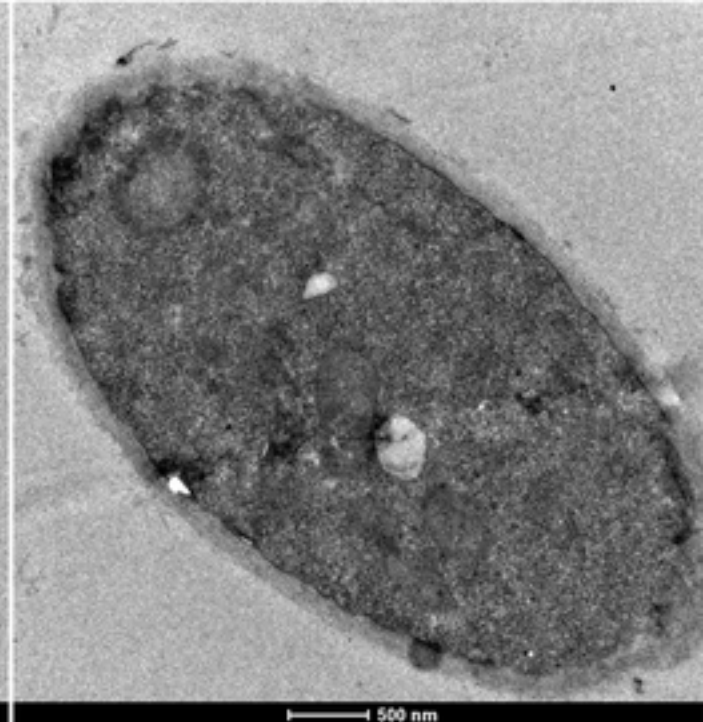

**OE-Afrp3**

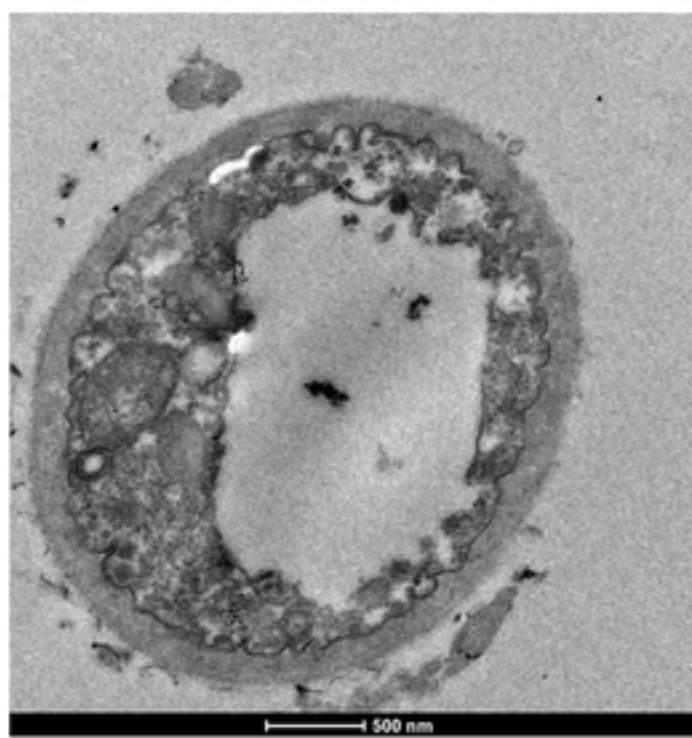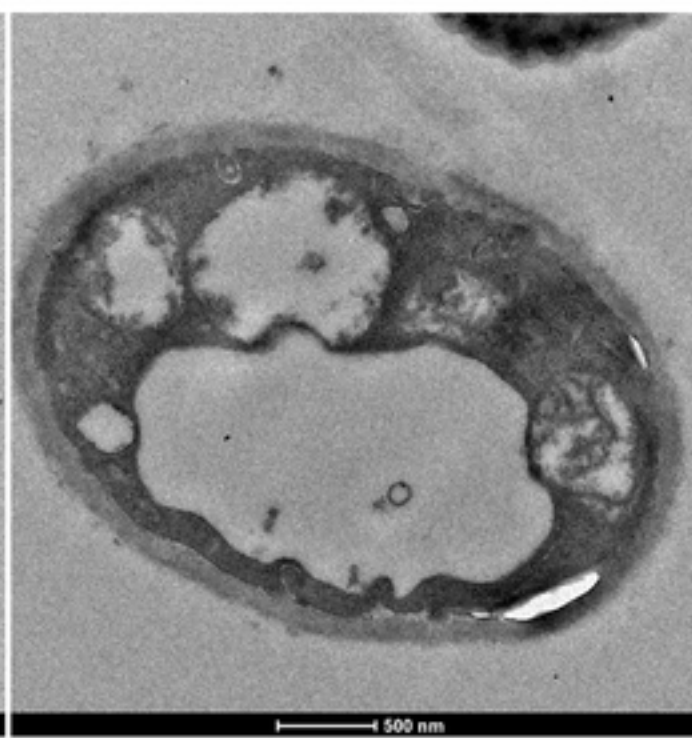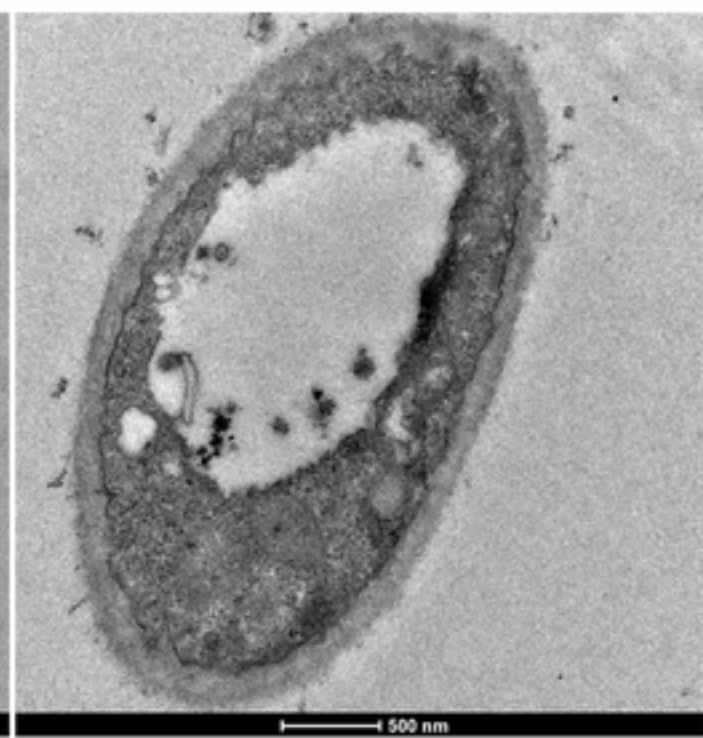

Figure-5



**A.**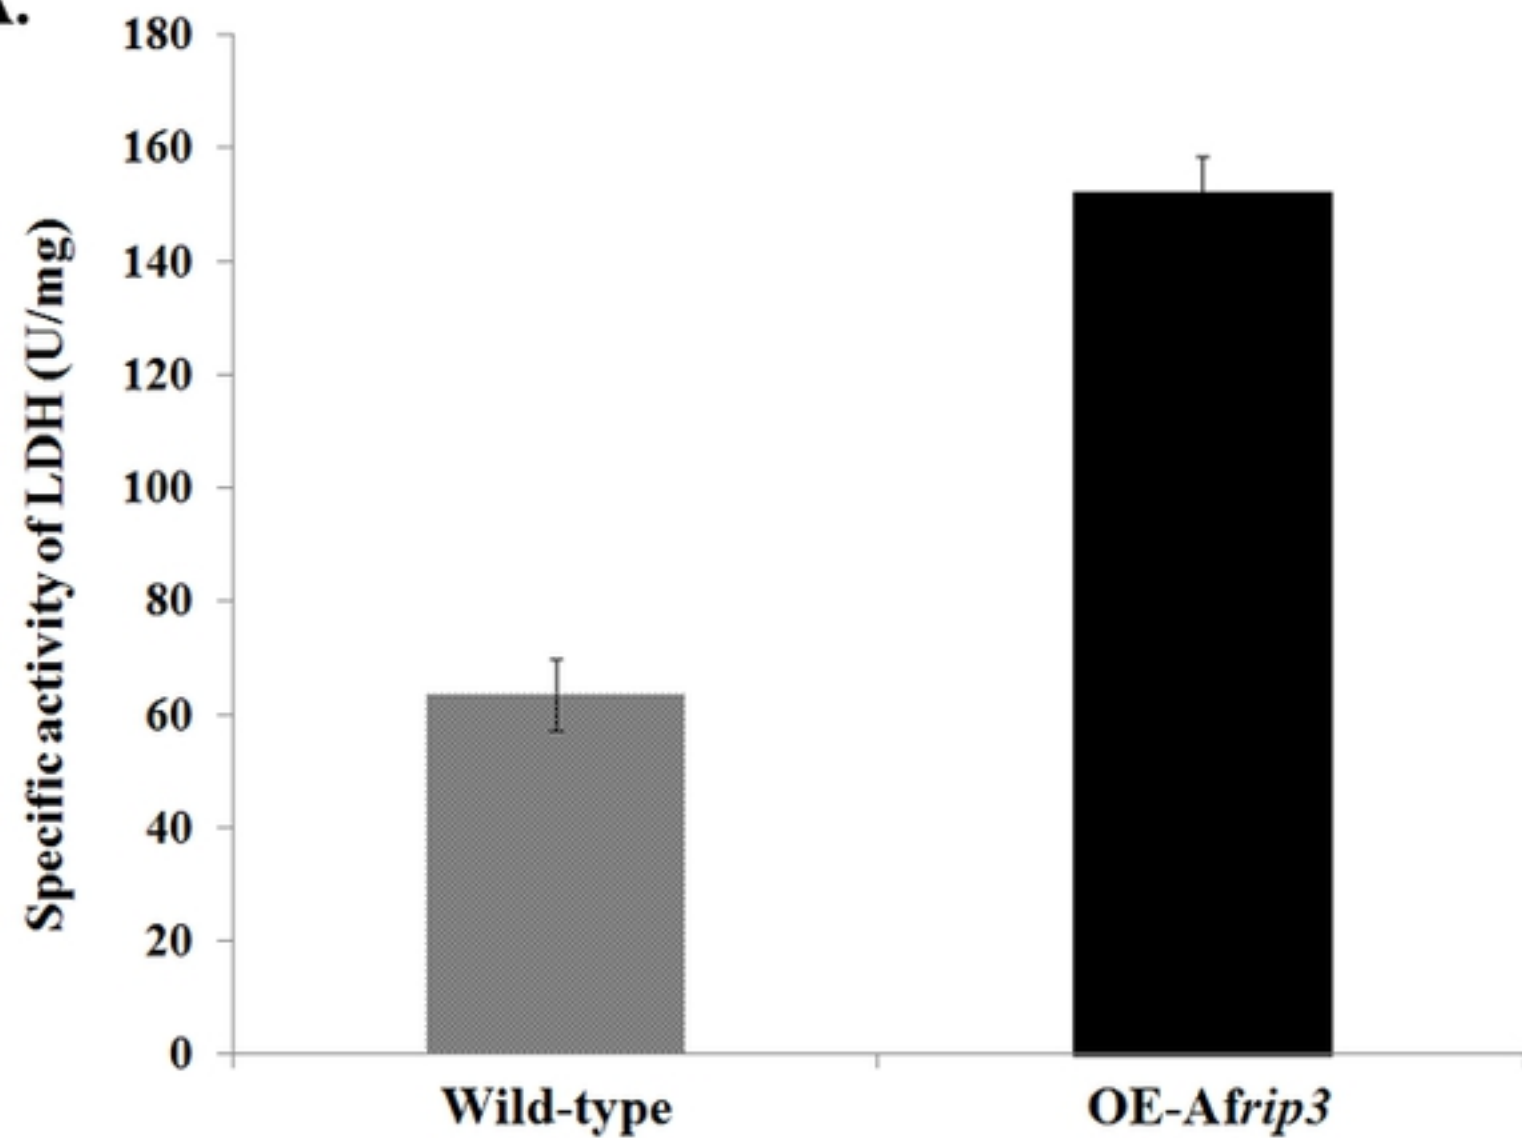**B.**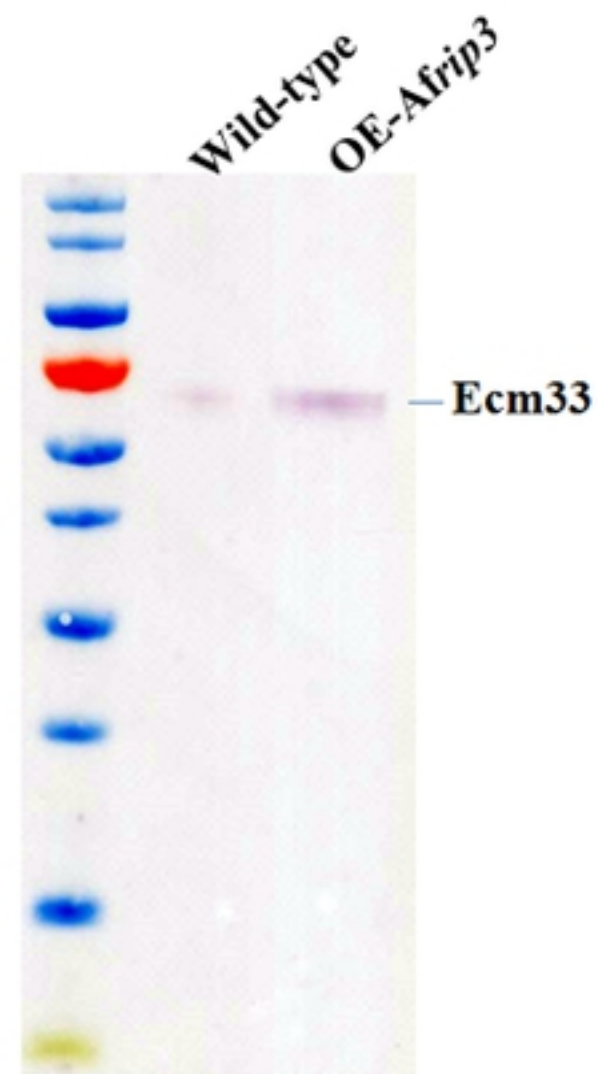

Figure-6

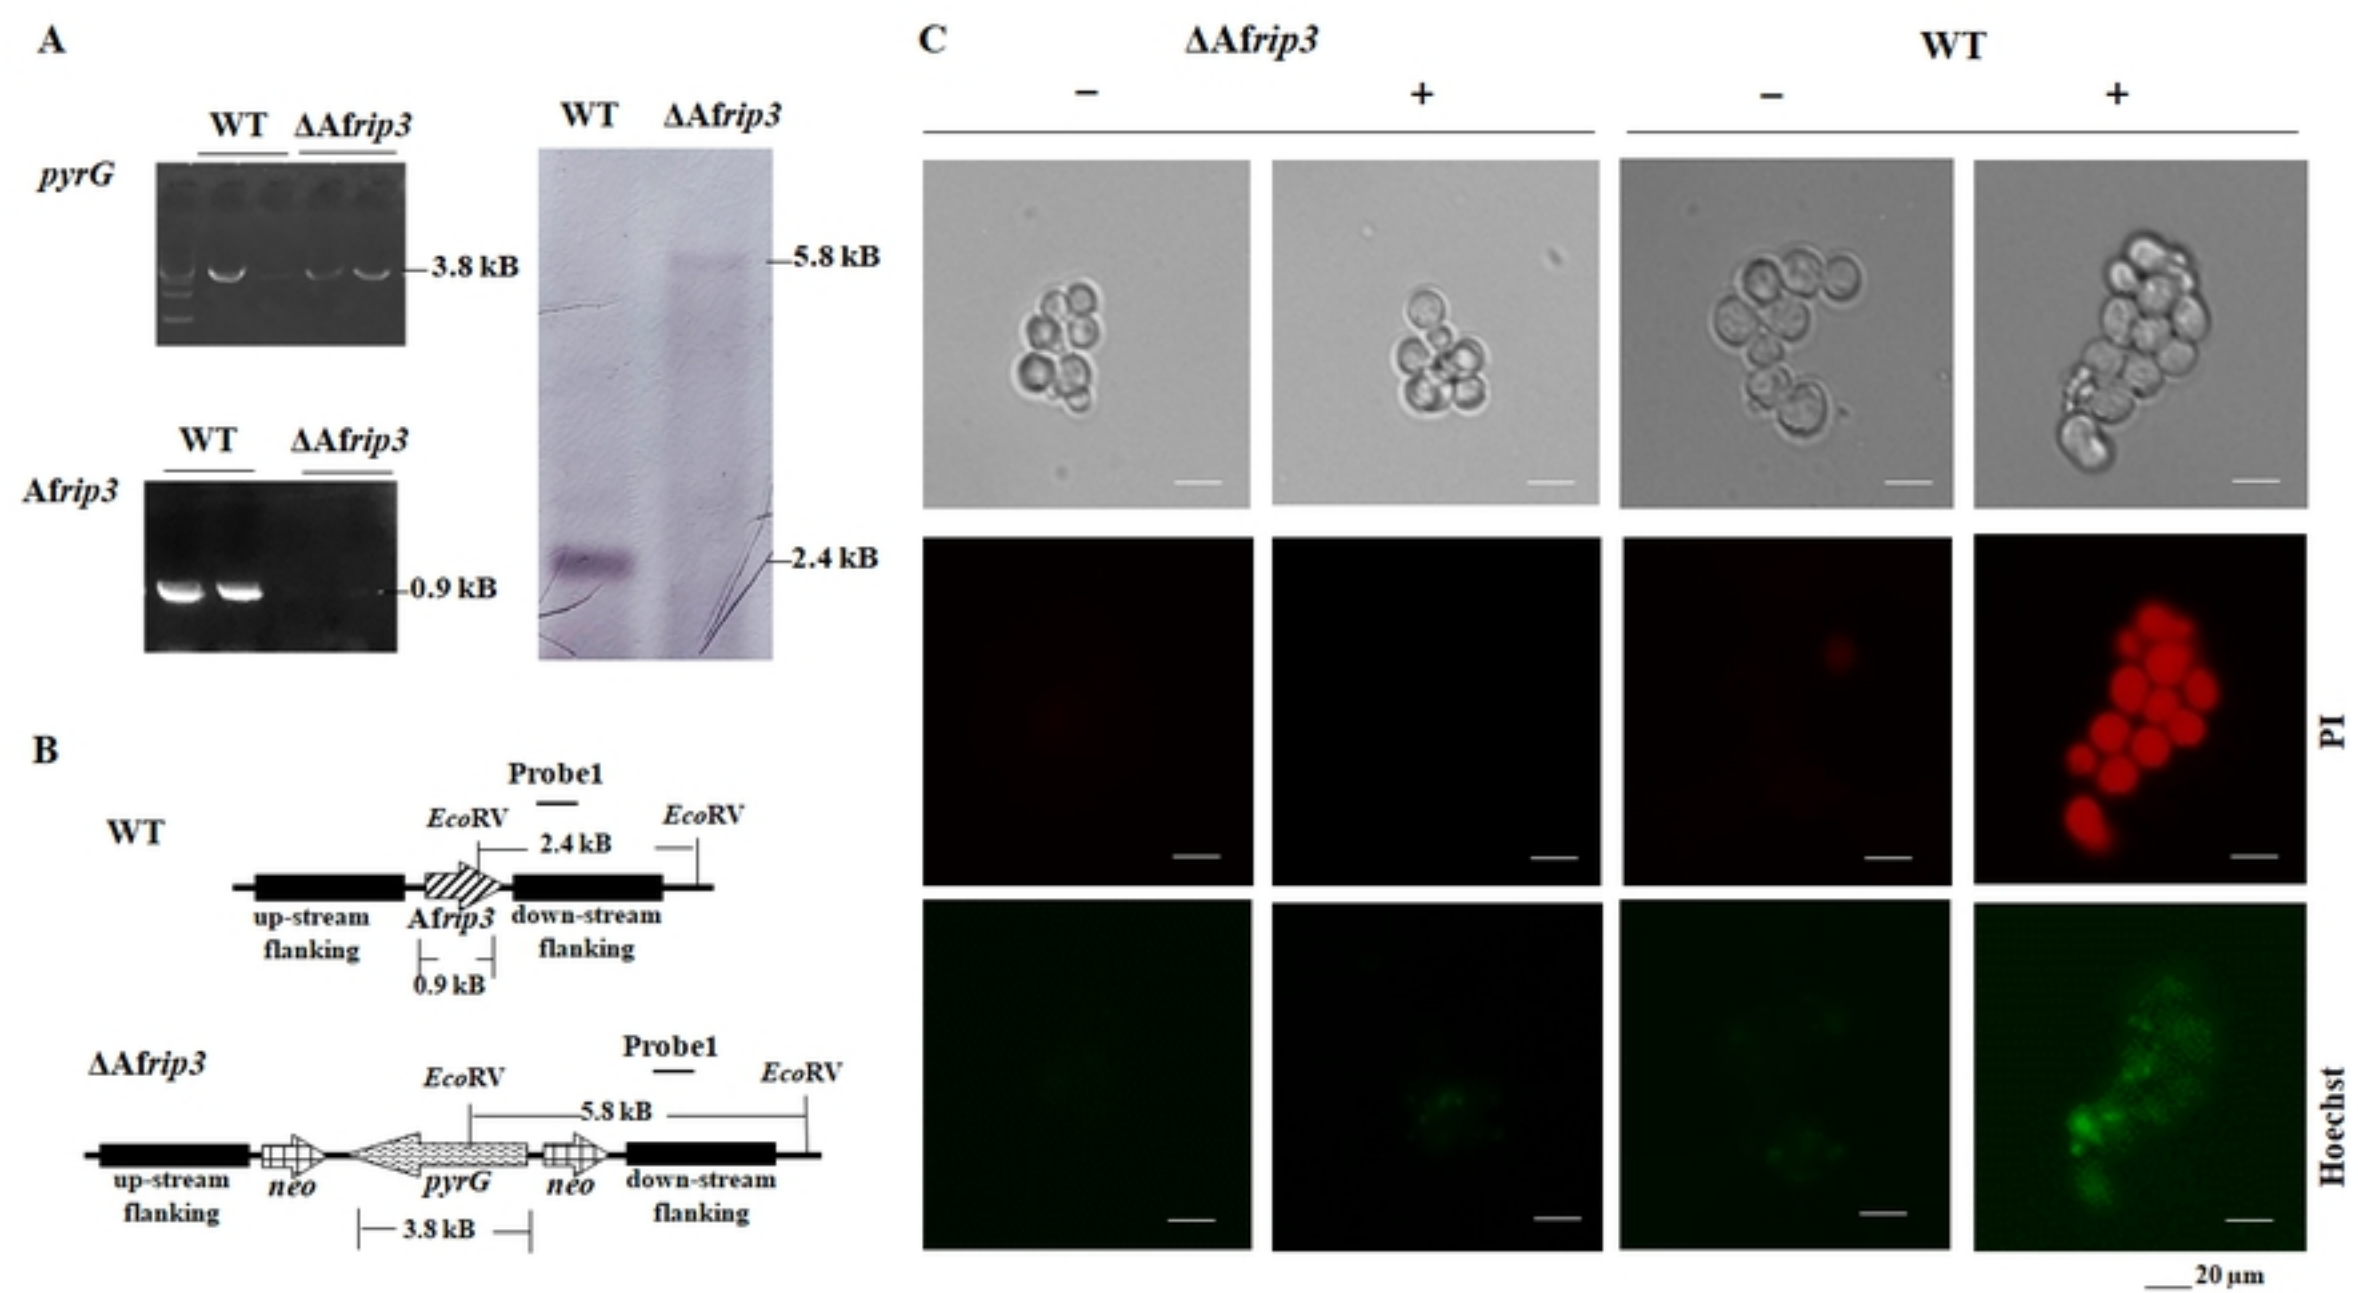

Figure-7

**A.**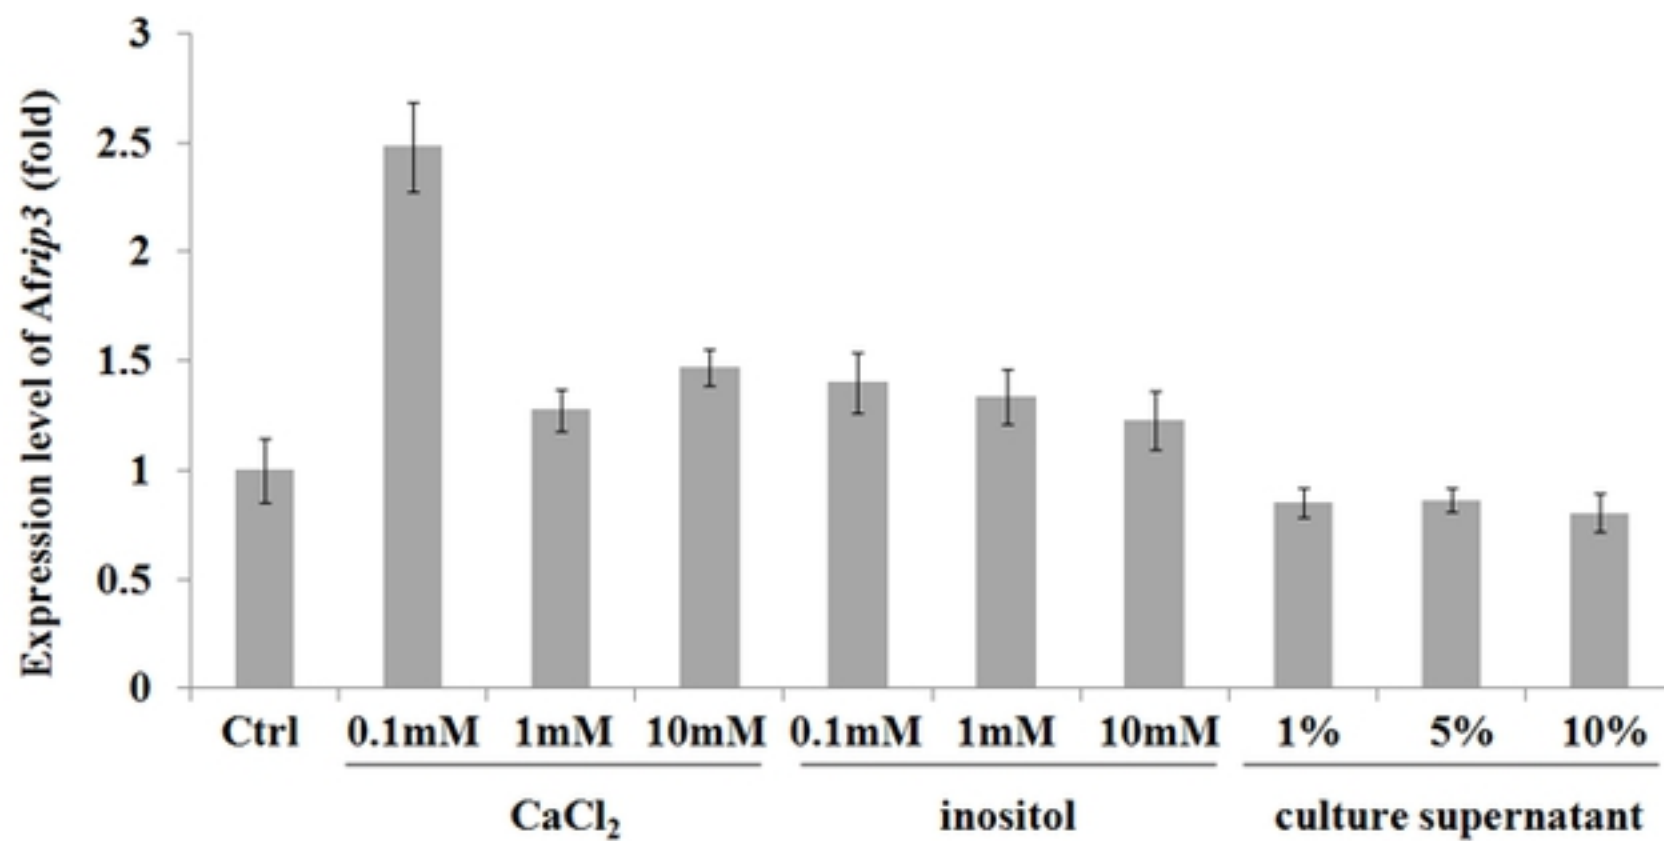**B.**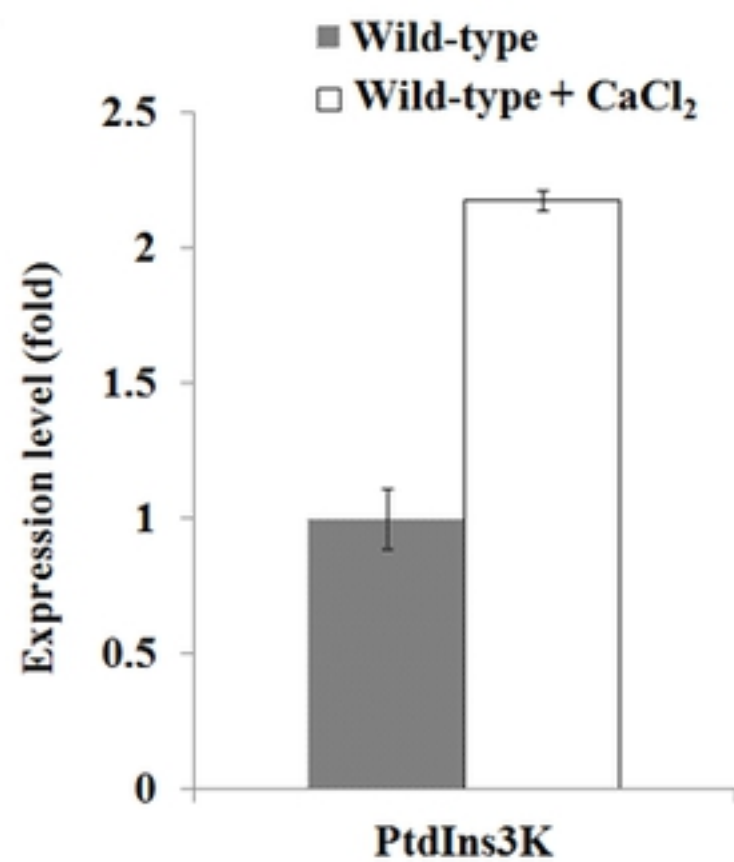**C.**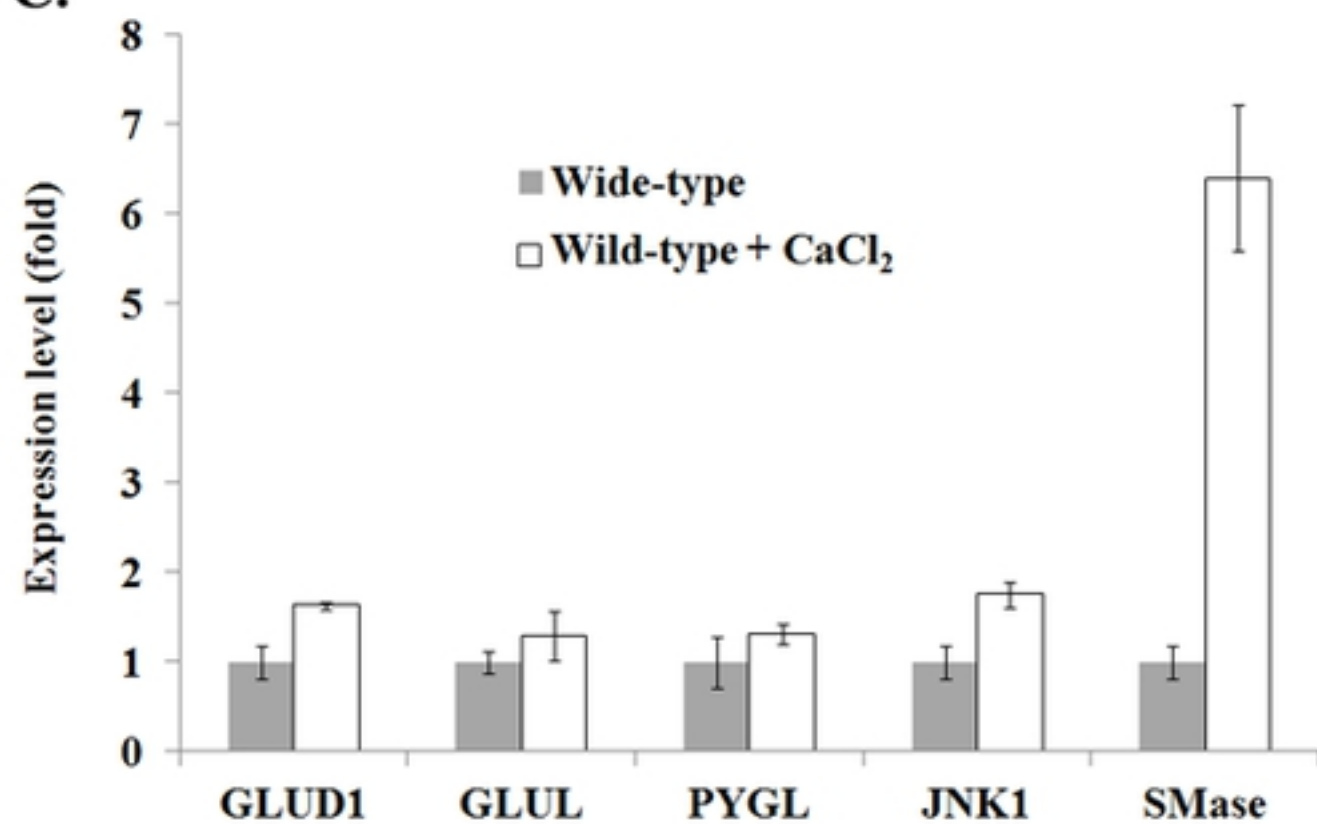

Figure-8

**Wild-type**

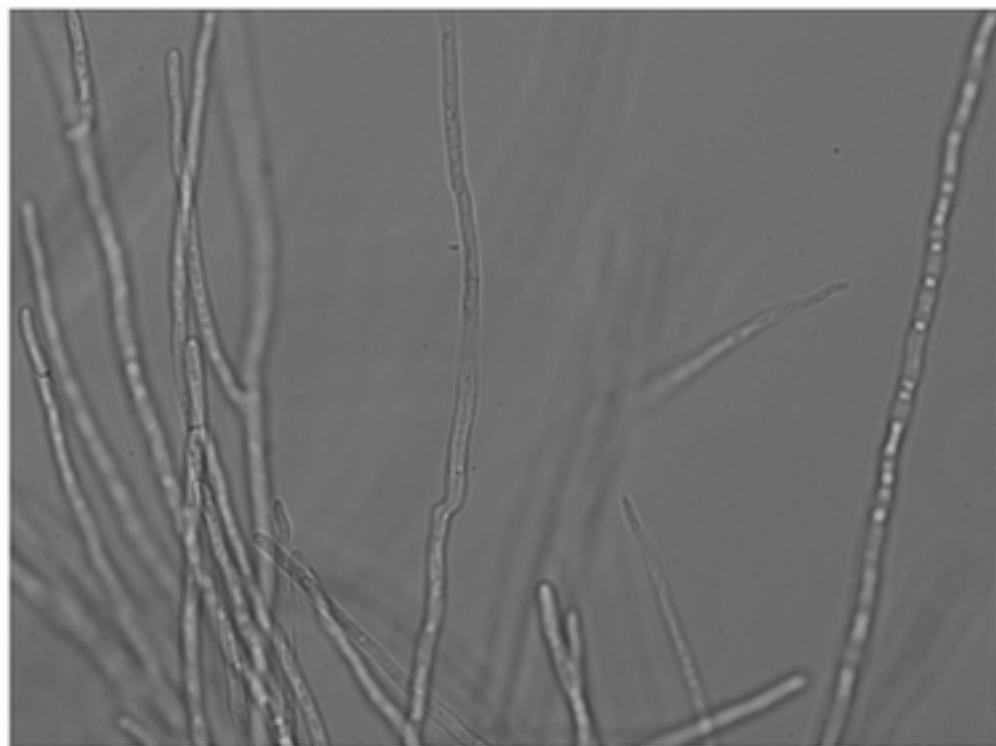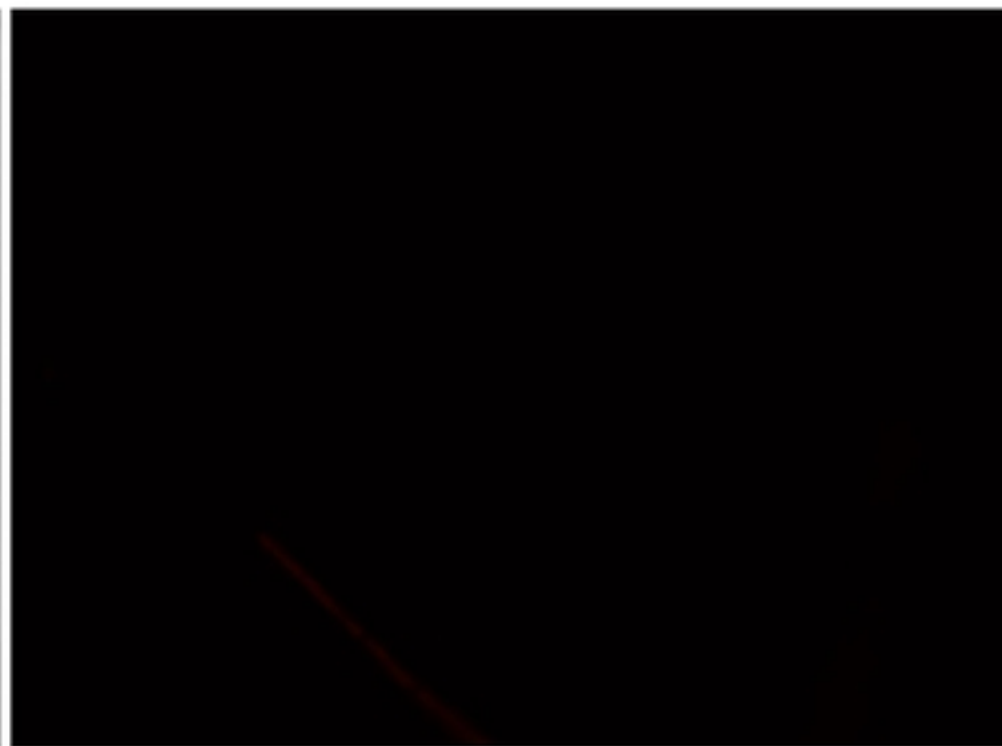

**OE-*Afrip3***

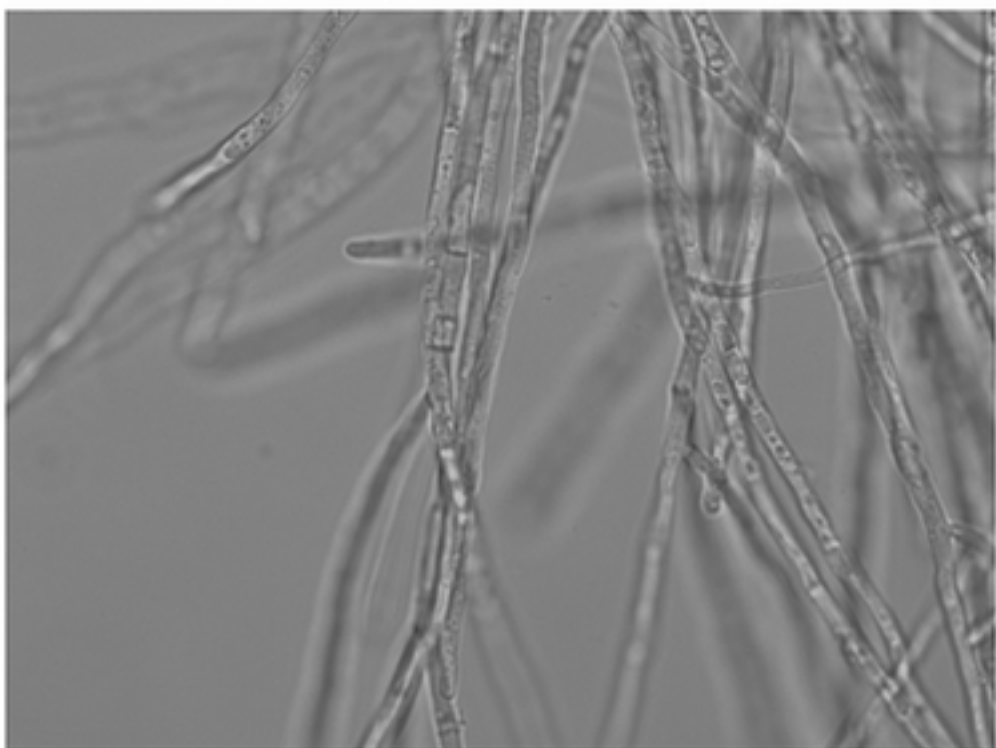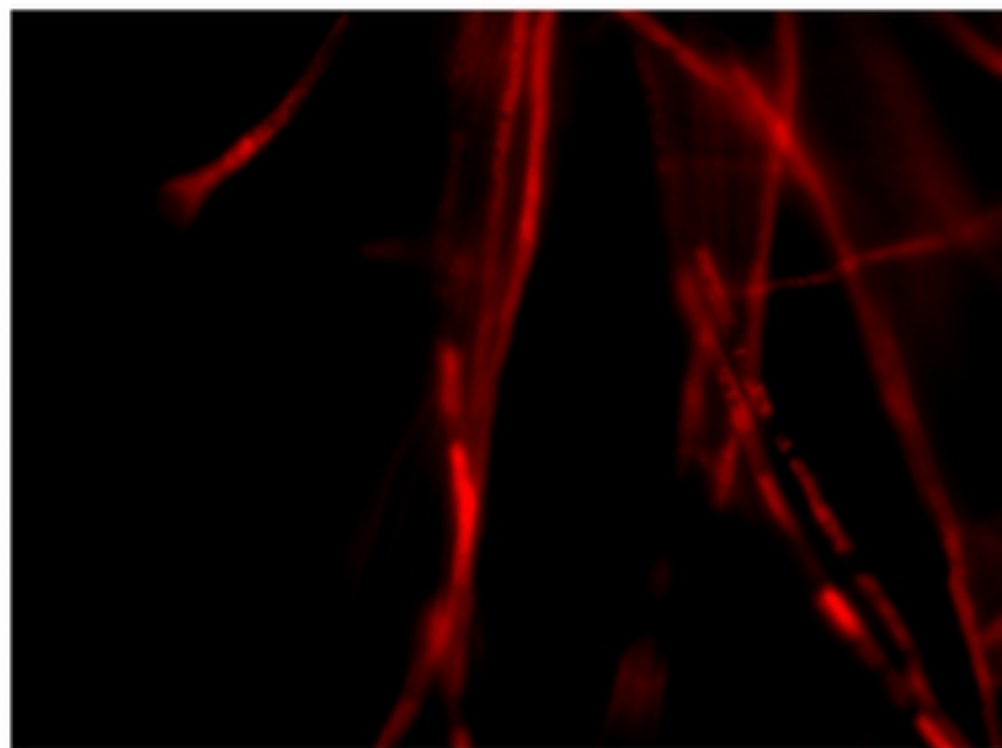

Figure-9

**A.**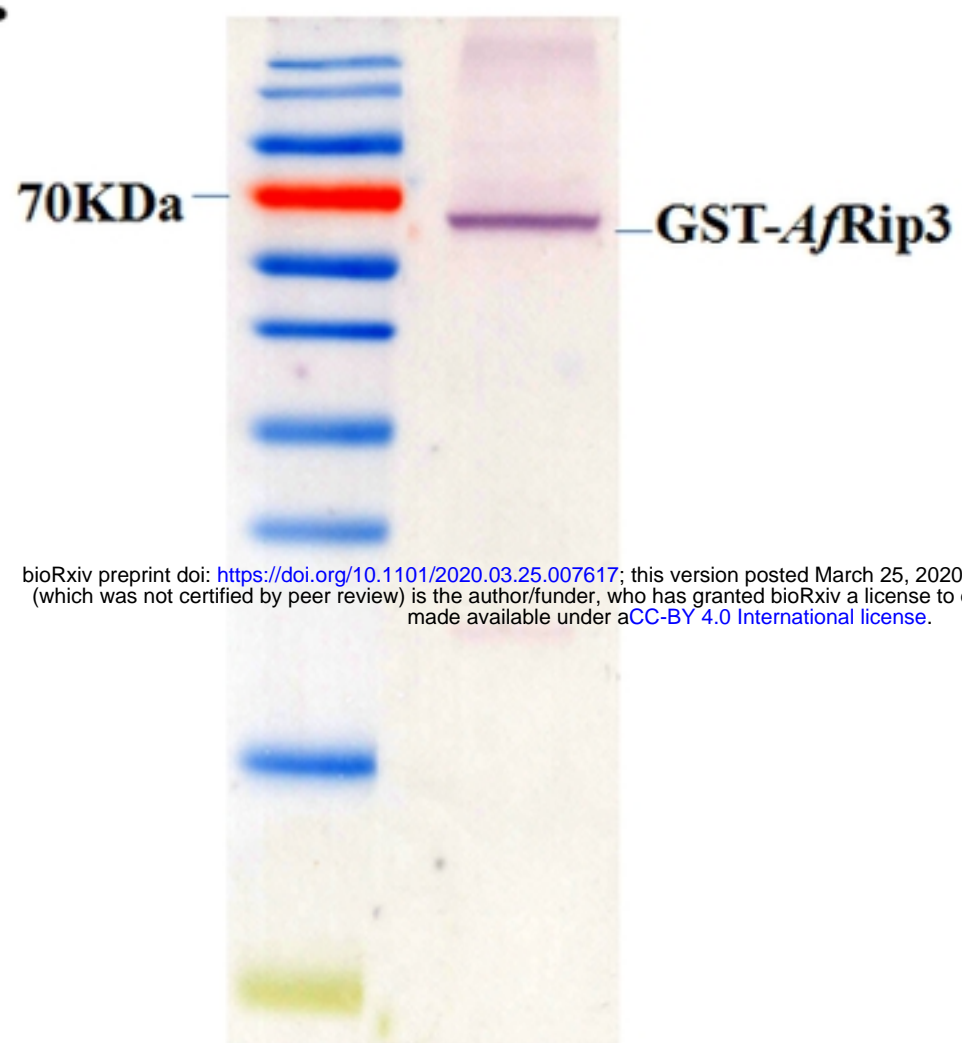**B.**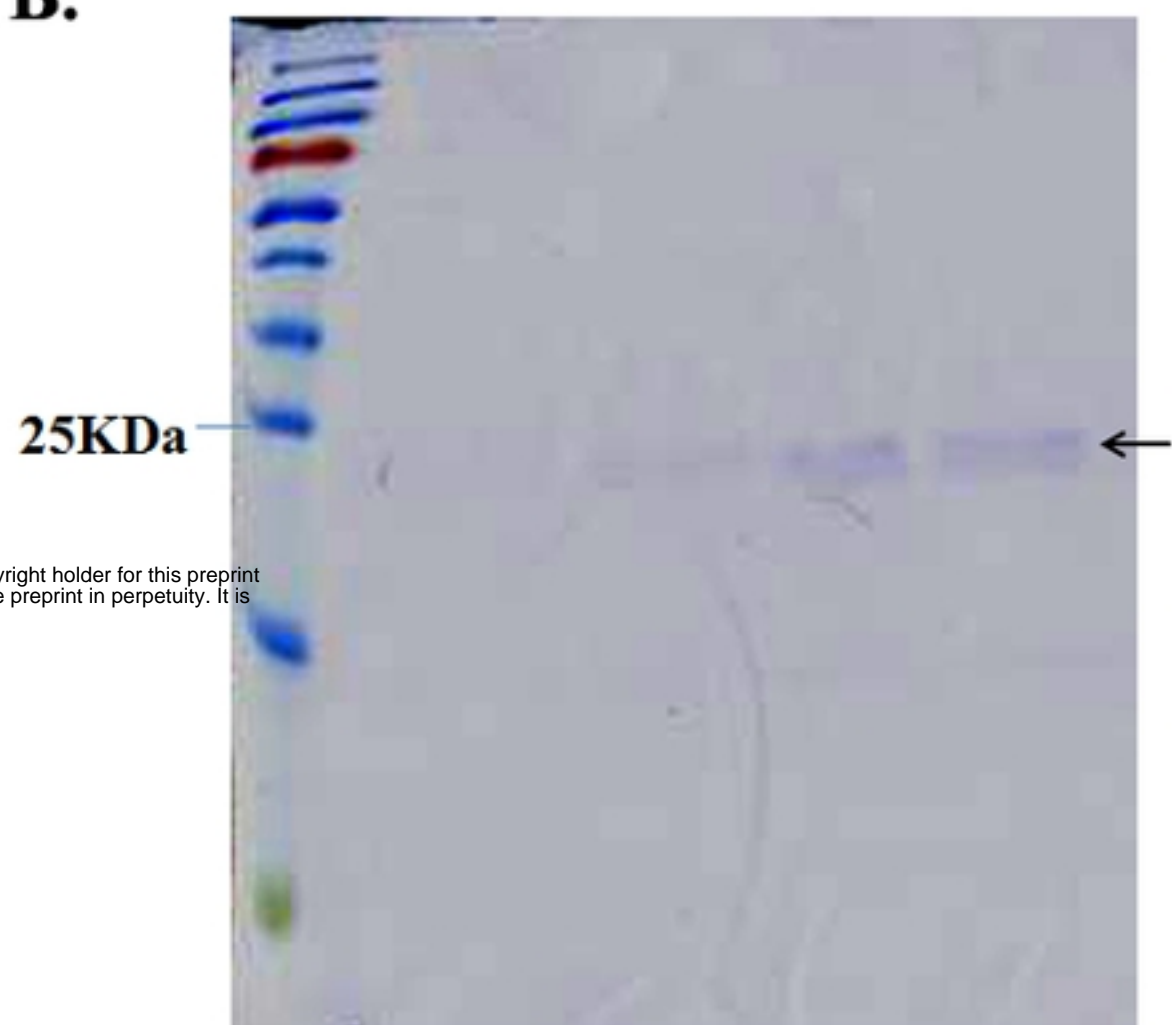

bioRxiv preprint doi: <https://doi.org/10.1101/2020.03.25.007617>; this version posted March 25, 2020. The copyright holder for this preprint (which was not certified by peer review) is the author/funder, who has granted bioRxiv a license to display the preprint in perpetuity. It is made available under aCC-BY 4.0 International license.

**C.**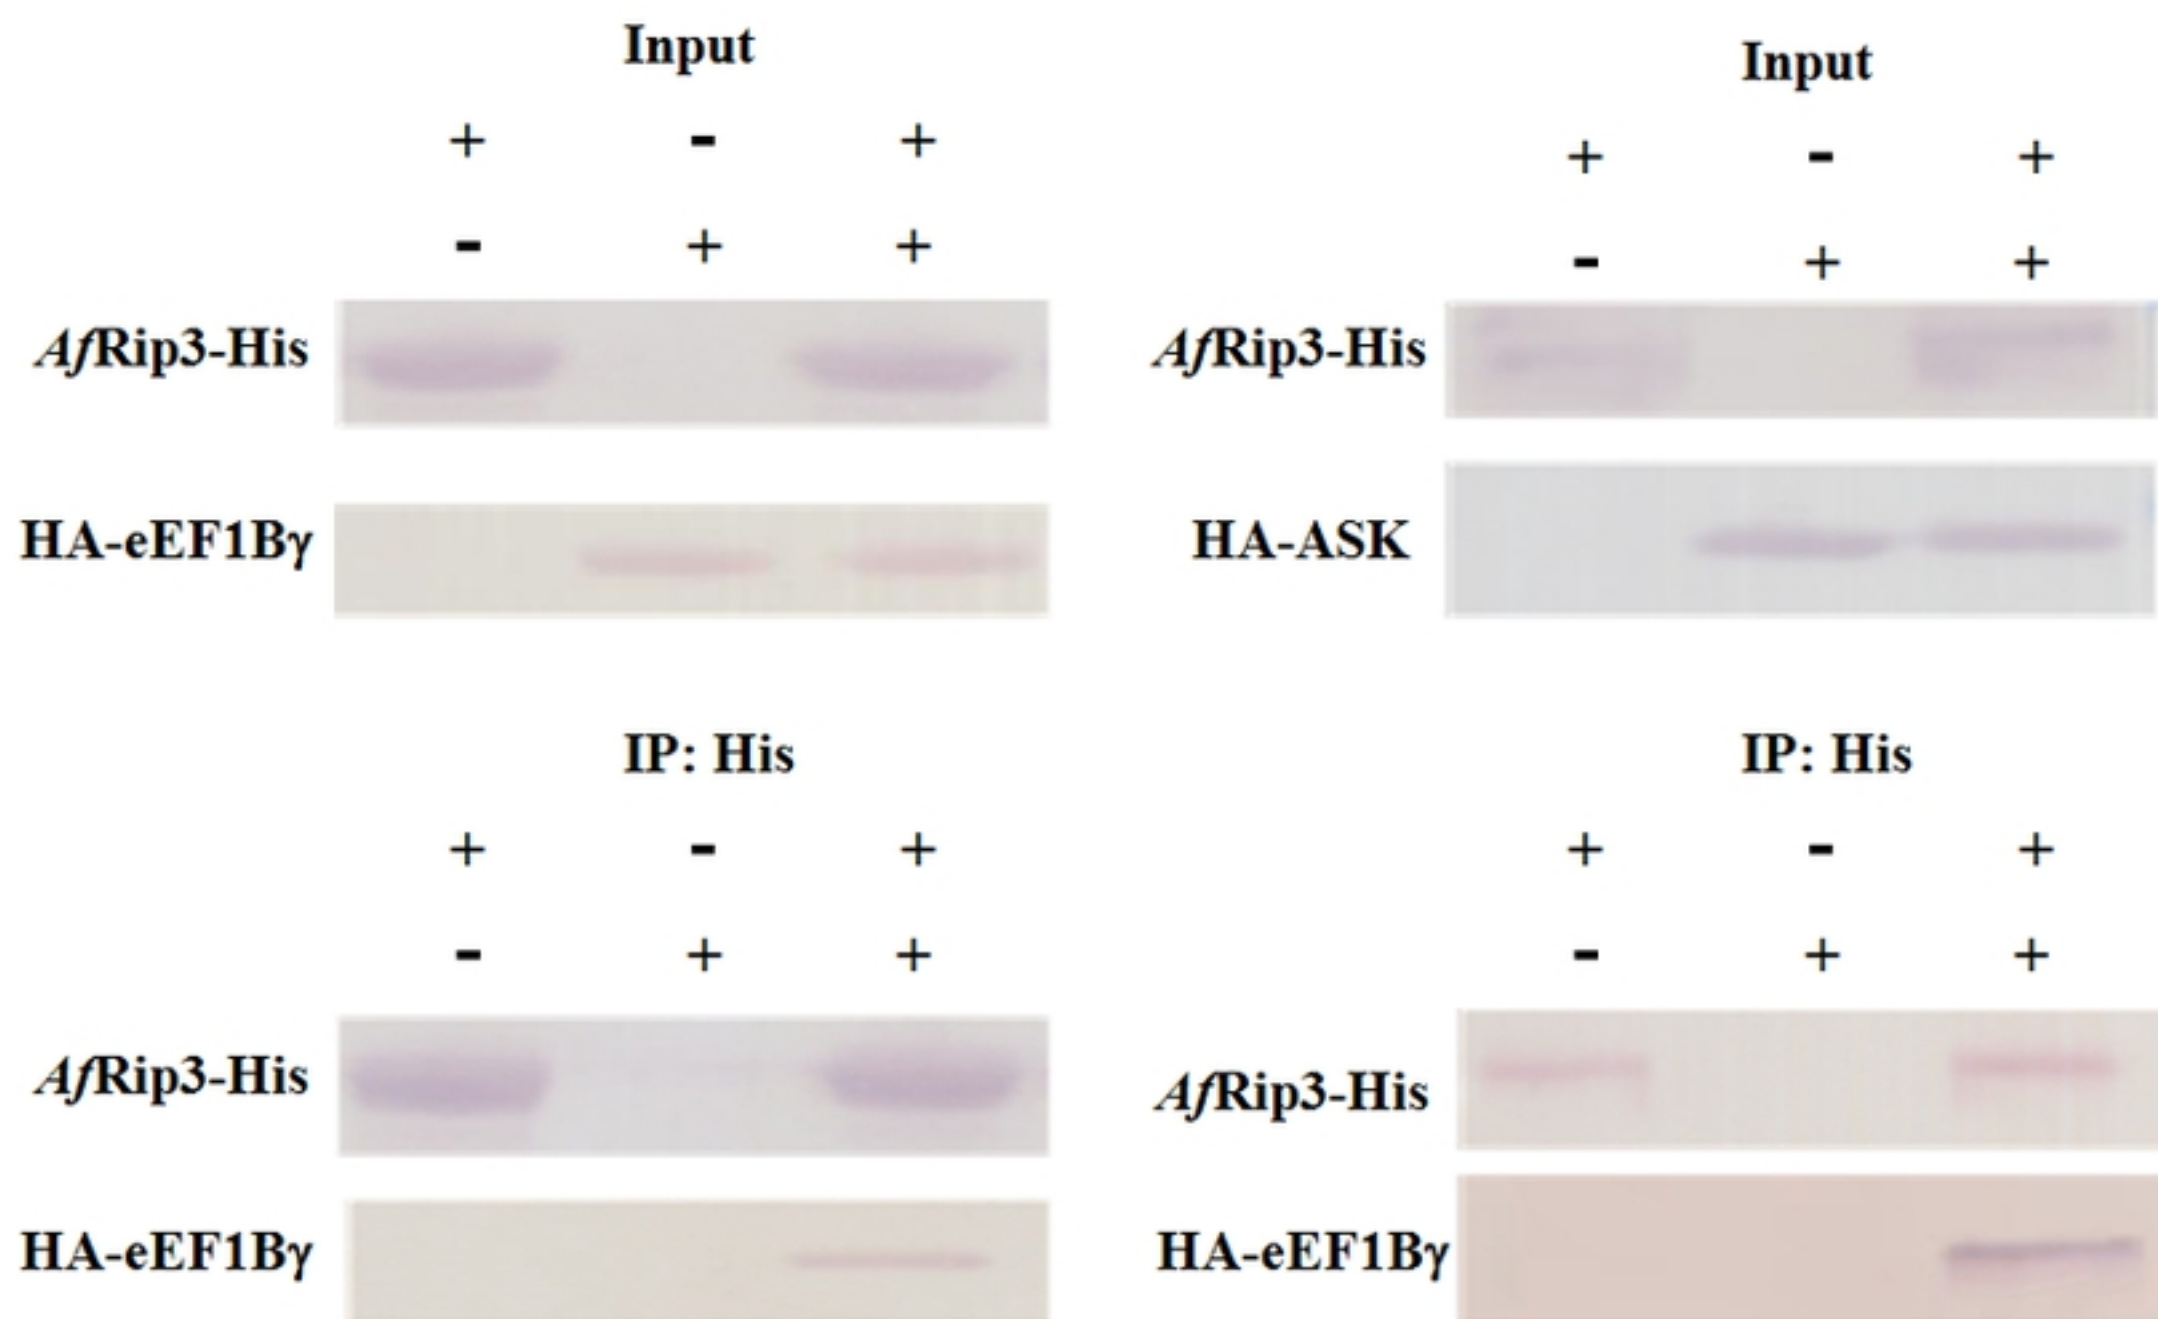

Figure-10
